# Supplementary material for: Post-acute blood biomarkers and disease progression in traumatic brain injury
Source: PubMed Central journal article supplement — Brain. 2022 Jun 2;145(6):2064–76. doi: 10.1093/brain/awac126 (PMC9326940; doi:10.1093/brain/awac126), 2022-06-02
Supplement: awac126_supplementary_data.pdf [file awac126_supplementary_data.pdf]

# Supplementary Data

## Post-acute blood biomarkers and disease progression in traumatic brain injury

VFJ Newcombe, PhD, NJ Ashton, JP Posti, B Glocker, A Manktelow, DA Chatfield, S Winzeck, E Needham, M Correia, GB Williams, J Simrén, RSK Takala, AJ Katila, H-R Maanpää, J Tallus, J Frantzén, K Blennow, PhD, O Tenovuo, H Zetterberg, DK Menon.

### Corresponding authors:

Virginia F.J. Newcombe, email: [vfjn2@cam.ac.uk](mailto:vfjn2@cam.ac.uk)

David K Menon, email: [dkm13@cam.ac.uk](mailto:dkm13@cam.ac.uk)

## **MRI Sequence Details:**

### **Turku University Hospital Cohort**

MR imaging was performed with a 3T MRI scanner (Siemens Magnetom Verio, Siemens Healthcare, Erlangen, Germany). Diffusion MRI (dMRI) was performed using a spin-echo echo-planar imaging sequence with a repetition time of 11.7 s, echo time 106ms,  $2 \times 2 \times 2$  mm voxel size resulting in 77 axial slices and a field of view of  $192 \times 192$  mm. Sixty-four encoding directions uniformly distributed on a unit sphere with diffusion gradients of  $b = 1000$  s/mm<sup>2</sup> were used. The T1 weighted sequence was a Magnetization-Prepared Rapid Gradient-Echo (MPRAGE) sequence was acquired with parameters: TR 2300 ms, TE 2.98 ms, TI 900 ms, flip angle 9°, matrix size 256 x 249 x 176 and an isotropic voxel size of 1.0 x 1.0 x 1.0 mm, sagittal slices, using Prescan Normalizer 2D distortion correction. Additional acquired MRI sequences included Proton Density Weighted T2 (PD-T2), susceptibility weighted imaging (repetition time of 28ms, echo time 20ms and  $0.6 \times 0.5 \times 1.2$  mm voxel size) and fluid attenuated inversion recovery (FLAIR).

### **Cambridge University Cohort**

For the >5 year time point and associated controls MR imaging was performed with a 3T MRI scanner (Siemens Magnetom Prisma Fit Siemens Healthcare, Erlangen, Germany). The diffusion weighted sequence was a multi-band, multi-shell acquisition protocol with the following parameters: TR = 2433 ms, TE = 75 ms, flip angle = 80 degrees, voxel size = 1.75mm isotropic, 98 directions, with 3 diffusion shells at  $b = 300$  s/mm<sup>2</sup> (8 directions),  $1000$  s/mm<sup>2</sup> (30 directions) and  $2000$  s/mm<sup>2</sup> (60 directions). The sequence included 5  $b = 0$  s/mm<sup>2</sup> interspersed throughout. Both the posterior to anterior and the anterior to posterior phase encoding directions were collected to correct for phase-encoding direction-induced distortions. The T1 weighted sequence was a Magnetization-Prepared Rapid Gradient-Echo

(MPRAGE) sequence was acquired with parameters: TR 2300 ms, TE 2.98 ms, TI 900 ms, flip angle 9°, matrix size 256 x 249 x 176 and an isotropic voxel size of 1.0 x 1.0 x 1.0 mm, sagittal slices, using Prescan Normalizer 2D distortion correction. Additional acquired MRI sequences included susceptibility weighted imaging (repetition time of 29ms, echo time 20ms and 0.5 × 0.5 × 2.0 mm voxel size), 3D T2 (voxel size 0.7 x 0.7 x 4.0 mm) and 3D fluid attenuated inversion recovery (FLAIR, voxel size 0.7 x 0.7 x 2.0 mm).

For the 12 patients and 15 controls who had longitudinal imaging the initial scanning was performed on a 3T MRI scanner (Siemens Magnetom Verio, Siemens Healthcare, Erlangen, Germany). The T1 weighted sequence was a Magnetization-Prepared Rapid Gradient-Echo (MPRAGE) sequence was acquired with parameters: TR 2300 ms, TE 2.98 ms, TI 900 ms, flip angle 9°, matrix size 256 x 249 x 176 and an isotropic voxel size of 1.0 x 1.0 x 1.0 mm, sagittal slices, using Prescan Normalizer 2D distortion correction.

## Machine Learning Model for Brain Age Regression

We employed three-dimensional, deep convolutional neural networks (CNNs) for brain age regression. The networks consist of two convolutional and three fully-connected layers. The outputs of the two convolutional layers and the first two fully-connected layers were passed through rectified linear unit activation functions. The convolutional layers used a kernel size of 5x5x5, stride of one, and no padding. Max pooling with a kernel size of 2 x 2 x 2 on the outputs of the convolutional layers was used to reduce the spatial dimensionality of the output feature maps. The number of feature maps for the two convolutional layers were 6 and 16, respectively. The number of output features for the three fully-connected layers were 120, 84, and 1, where the last output corresponds to the age prediction.

Age regression was performed on SPM12-derived whole brain grey matter (WBGM) and white matter (WBWM) probability maps, spatially normalized to MNI space. The WBGM and WBWM maps were extracted from the anatomical, T1-weighted brain MRI. As pre-processing step, we resample the input GM and WM probability maps to 96 x 96 x 96 with an isotropic voxel size of 2 x 2 x 2 mm. Two separate CNNs, one for WBGM and one for WBWM-based age regression were trained. We utilized the Cam-CAN dataset with 652 healthy controls for method development, where we used a random split of 600 subjects for model training, and 52 subjects for internal validation and parameter tuning. The CNNs were each trained for 100 epochs with a batch size of 16, resulting in about 3,700 iterations. We used the Adam optimizer with a learning rate of 0.001. The internal validation on the 52 subjects shows a mean absolute error of 5.03 and 6.20 years and an  $R^2$  of 0.90 and 0.85 for the WBGM and WBWM models, respectively. The software implementations were done in Python (v3.8) using the deep learning framework PyTorch (v1.8.1) and machine learning library scikit-learn (v0.24.1). The software code for brain age regression will be available on GitHub (<https://github.com/biomediamira/brain-age-cnn>).

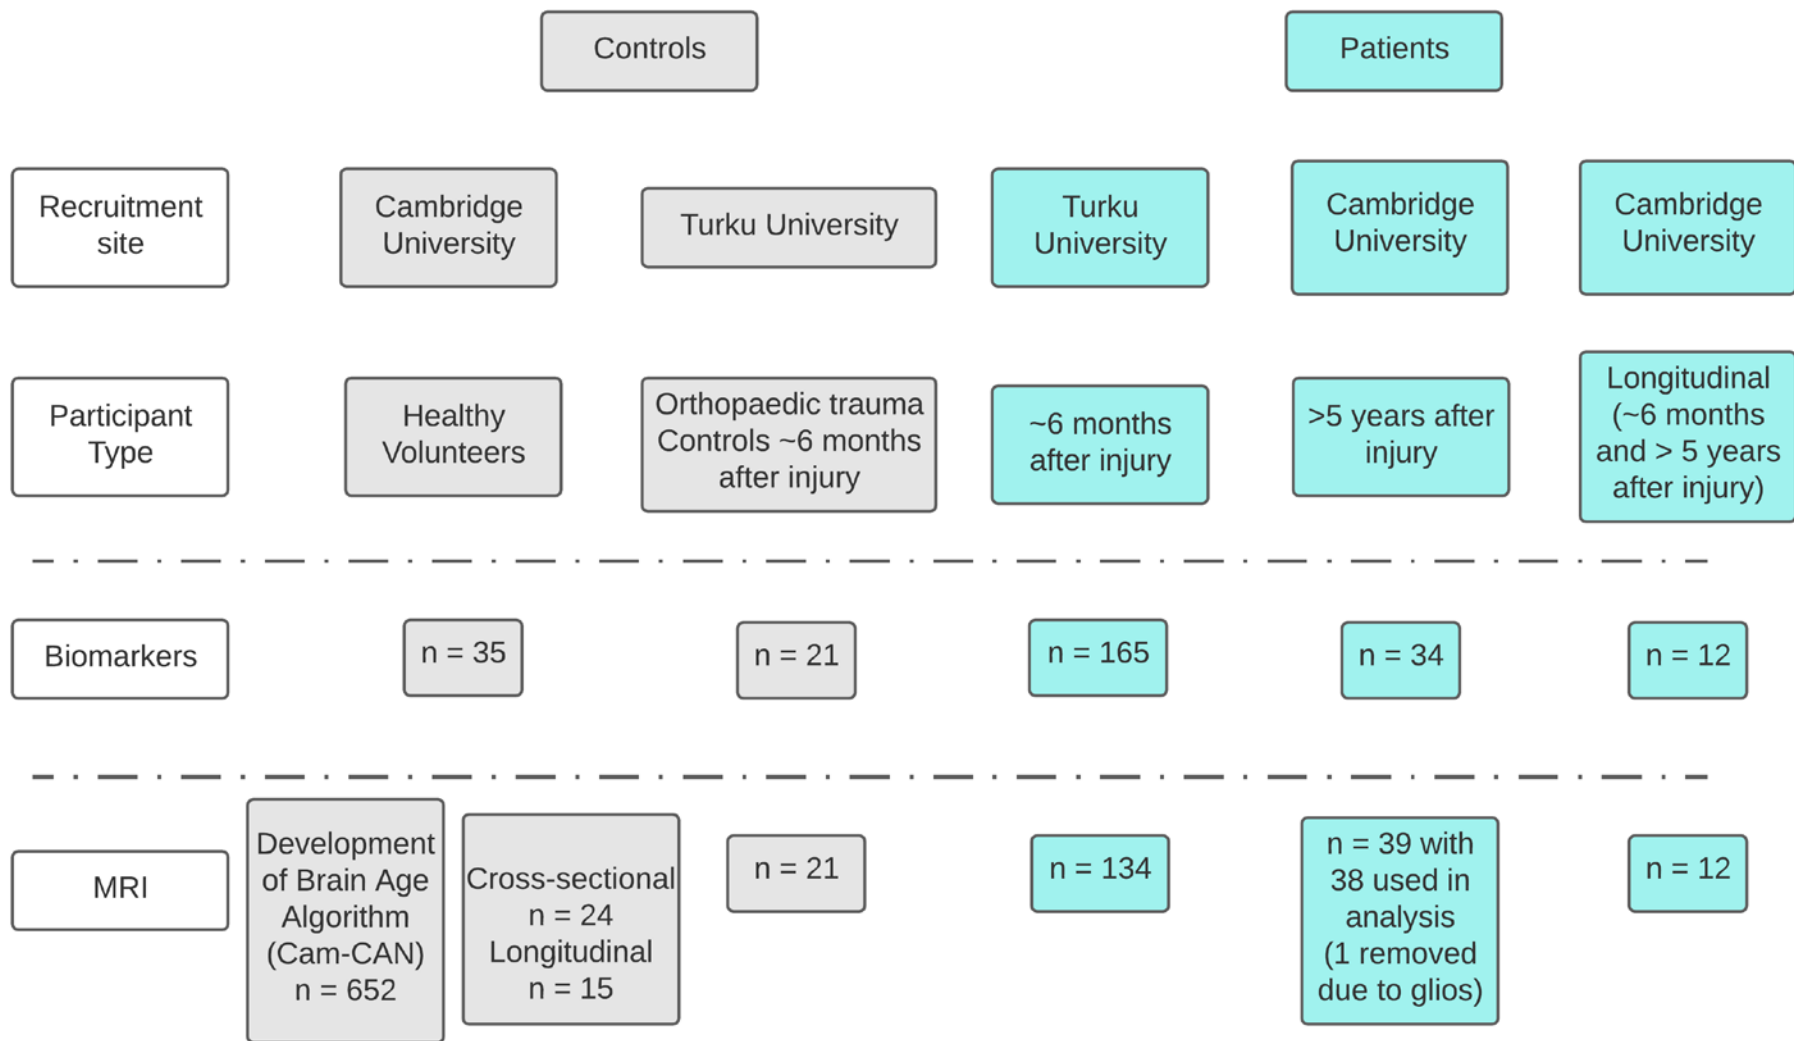

**Figure S1: Diagram of study participants.**

Imaging controls (Healthy volunteers or orthopaedic trauma controls) were used specific to each recruitment site.

**Table S1: Control and patient cohorts**

|                                   | Healthy Volunteers | Healthy Volunteers | Healthy Volunteers | Trauma Controls          | TBI ~8 months after injury | TBI >5 years after injury | Longitudinal scans       |                        |
|-----------------------------------|--------------------|--------------------|--------------------|--------------------------|----------------------------|---------------------------|--------------------------|------------------------|
| <b>Biomarkers</b>                 | 35                 |                    |                    | 21                       | 165                        | 34                        |                          |                        |
| <b>MRI</b>                        |                    | 24                 | 15                 | 21                       | 134                        | 38                        |                          | 12                     |
| <b>Age (years, mean (SD))</b>     | 46 (± 13)          | 46.8(± 19)         |                    | 45.8(± 16)               | 46 (± 19)                  | 49 (± 18)                 |                          | 12<br>42.4(± 17)       |
| <b>Sex</b>                        |                    |                    |                    |                          |                            |                           |                          |                        |
| Male                              | 23 (66 %)          | 16 (66.6%)         | 10 (66.6%)         | 11                       | 124 (75 %)                 | 29 (76 %)                 |                          | 10                     |
| Female                            | 12 (34 %)          | 8 (33.3%)          | 5 (33.3%)          | 10                       | 41 (25 %)                  | 9 (24 %)                  |                          | 2(17%)<br>7 (3 to 11)  |
| <b>GCS (median (range))</b>       |                    |                    |                    |                          | 14 (3 - 15)                | 7 (3 - 15)                |                          |                        |
| <b>Marshall CT Score</b>          |                    |                    |                    |                          |                            |                           |                          |                        |
| I                                 |                    |                    |                    |                          | 59 (36 %)                  | 2 (5 %)                   |                          | 1 (8%)                 |
| II                                |                    |                    |                    |                          | 33 (20 %)                  | 18 (47 %)                 |                          | 5 (42%)                |
| III                               |                    |                    |                    |                          | 1 (1 %)                    | 1 (3 %)                   |                          | 0 (0%)                 |
| IV                                |                    |                    |                    |                          | 1 (1 %)                    | 0 (0 %)                   |                          | 0 (0%)                 |
| V                                 |                    |                    |                    |                          | 36 (22 %)                  | 9 (24 %)                  |                          | 3 (25%)                |
| VI                                |                    |                    |                    |                          | 35 (21 %)                  | 8 (21 %)                  |                          | 3 (25%)                |
| <b>Time to biomarker sampling</b> |                    |                    |                    |                          |                            |                           | <b>Scan 1</b>            | <b>Scan 2</b>          |
| mean(SD)                          |                    |                    |                    | 8.1(±2.2) months         | 8.2 (± 2.4) months         | 8.3 (± 2.1) years         | 7.3 (± 2.1) months       | 6.1(± 0.8) years       |
| median (range)                    |                    |                    |                    | 7.8 (5.7 to 15.6) months | 6.4 (5.6 to 16.3) months   | 7.5(3.6 to 13.7) years    | 6.2 (5.5 to 12.6) months | 6.3 (3.6 to 7.1) years |
| <b>Time to MRI</b>                |                    |                    |                    |                          |                            |                           |                          |                        |
| mean(SD)                          |                    |                    |                    | 8.1(±2.2) months         | 8.3 (± 2.7) months         | 8.4 (± 2.3) years         | 7.3 (± 2.1) months       | 6.1(± 0.8) years       |
| median (range)                    |                    |                    |                    | 7.8 (5.7 to 15.6) months | 6.8 (5.6 to 16.3) months   | 7.6(3.6 to 13.7) years    | 6.2 (5.5 to 12.6) months | 6.3 (3.6 to 7.1) years |
| <b>Mechanism of Injury</b>        |                    |                    |                    |                          |                            |                           |                          |                        |
| RTC                               |                    |                    |                    |                          | 59 (36%)                   | 22 (65%)                  |                          | 7 (6%)                 |
| Assault                           |                    |                    |                    |                          | 14 (8%)                    | 1 (3%)                    |                          | 1 (8%)                 |
| Fall                              |                    |                    |                    |                          | 85 (52%)                   | 7 (21%)                   |                          | 4 (33%)                |
| Impact to head                    |                    |                    |                    |                          | 0 (0%)                     | 4 (12%)                   |                          | 0 (0%)                 |
| Other                             |                    |                    |                    |                          | 7 (4%)                     | 0 (0%)                    |                          | 0 (0%)                 |
| <b>GOSE (median (range))</b>      |                    |                    |                    |                          | 7 (3 - 8)                  | 6 (3 - 8)                 |                          | 6 (5 to 8)             |

GCS = Glasgow Coma Score upon admission or initial injury assessment, CT = Computed Tomography, MRI = magnetic resonance imaging, RTC = road traffic collision, GOSE = Glasgow Outcome Score Extended.

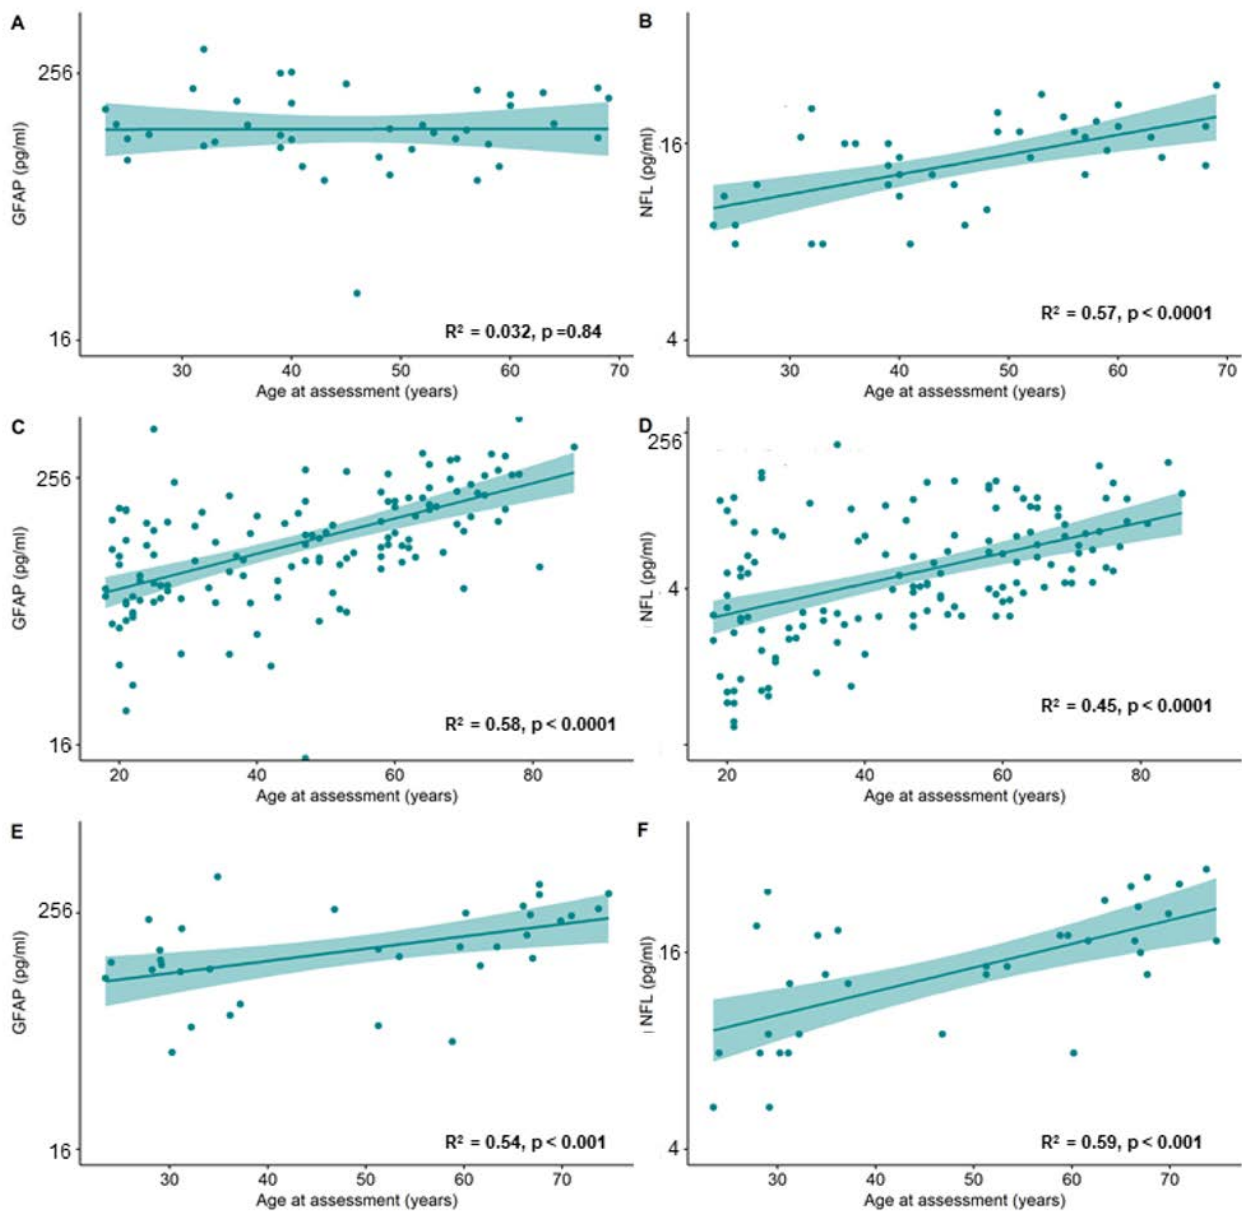

**Figure S2: Relationship of age and levels of NFL and GFP.** A and B are healthy volunteers, C and D patients ~8 months after TBI, E and D patients > 5 years after TBI. . Biomarker levels are shown on a log2 scale, but with original measured biomarker concentrations in pg/ml to facilitate clinical interpretation. Unadjusted R values shown.

**Supplementary Table S2: Fractional anisotropy and mean diffusivity for the projection fibre tracts, commissural fibre tracts and thalamic radiations for patients ~6 months after TBI compared to trauma controls.** All data reported as median (IQR). Adjusted p-values (Benjamini & Hochberg Correction) are significant if <0.05. Significant values are shown in bold with \*

|                                          | Fractional Anisotropy |                     |         |                  | Mean Diffusivity ( $\times 10^{-3}$ mm <sup>2</sup> /s) |                     |         |                  |
|------------------------------------------|-----------------------|---------------------|---------|------------------|---------------------------------------------------------|---------------------|---------|------------------|
|                                          | Controls              | Patients            | P-value | Adjusted P-Value | Controls                                                | Patients            | P-value | Adjusted P-Value |
| <b>Projection Fibres</b>                 |                       |                     |         |                  |                                                         |                     |         |                  |
| <i>Corticospinal tract Right</i>         | 0.49 ( $\pm$ 0.034)   | 0.50 ( $\pm$ 0.020) | 0.319   | 0.333            | 0.69 ( $\pm$ 0.050)                                     | 0.68 ( $\pm$ 0.029) | 0.083   | 0.087            |
| <i>Corticospinal tract Left</i>          | 0.50 ( $\pm$ 0.031)   | 0.50 ( $\pm$ 0.034) | 0.290   | 0.316            | 0.69 ( $\pm$ 0.045)                                     | 0.67 ( $\pm$ 0.039) | 0.031   | 0.038            |
| <b>Commissural Fibres</b>                |                       |                     |         |                  |                                                         |                     |         |                  |
| <i>CC Genu</i>                           | 0.37 ( $\pm$ 0.051)   | 0.38 ( $\pm$ 0.021) | 0.0096  | <b>0.041*</b>    | 0.79 ( $\pm$ 0.097)                                     | 0.76 ( $\pm$ 0.033) | 0.011   | <b>0.022*</b>    |
| <i>CC Body</i>                           | 0.44 ( $\pm$ 0.038)   | 0.46 ( $\pm$ 0.032) | 0.002   | <b>0.041*</b>    | 0.77 ( $\pm$ 0.068)                                     | 0.74 ( $\pm$ 0.025) | 0.002   | <b>0.017*</b>    |
| <i>Splenium</i>                          | 0.39 ( $\pm$ 0.040)   | 0.41 ( $\pm$ 0.021) | 0.005   | <b>0.041*</b>    | 0.81 ( $\pm$ 0.078)                                     | 0.77 ( $\pm$ 0.026) | 0.005   | <b>0.017*</b>    |
| <i>Commissure Anterior</i>               | 0.35 ( $\pm$ 0.044)   | 0.37 ( $\pm$ 0.049) | 0.012   | <b>0.041*</b>    | 0.83 ( $\pm$ 0.090)                                     | 0.80 ( $\pm$ 0.058) | 0.005   | <b>0.017*</b>    |
| <i>Fornix Right</i>                      | 0.33 ( $\pm$ 0.083)   | 0.39 ( $\pm$ 0.053) | <0.001  | <b>0.041*</b>    | 1.6 ( $\pm$ 0.27)                                       | 1.4 ( $\pm$ 0.18)   | <0.0001 | <b>0.005*</b>    |
| <i>Fornix Left</i>                       | 0.34 ( $\pm$ 0.12)    | 0.40 ( $\pm$ 0.061) | 0.006   | <b>0.041*</b>    | 1.6 ( $\pm$ 0.45)                                       | 1.5 ( $\pm$ 0.24)   | 0.021   | <b>0.030*</b>    |
| <b>Thalamic Radiations</b>               |                       |                     |         |                  |                                                         |                     |         |                  |
| <i>Thalamo-prefrontal Right</i>          | 0.36 ( $\pm$ 0.040)   | 0.38 ( $\pm$ 0.027) | 0.027   | 0.051            | 0.76 ( $\pm$ 0.087)                                     | 0.73 ( $\pm$ 0.034) | 0.014   | <b>0.025*</b>    |
| <i>Thalamo-prefrontal Left</i>           | 0.38 ( $\pm$ 0.037)   | 0.39 ( $\pm$ 0.032) | 0.022   | <b>0.048*</b>    | 0.75 ( $\pm$ 0.094)                                     | 0.72 ( $\pm$ 0.033) | 0.012   | <b>0.022*</b>    |
| <i>Thalamo-premotor Right</i>            | 0.41 ( $\pm$ 0.032)   | 0.42 ( $\pm$ 0.030) | 0.0433  | 0.067            | 0.71 ( $\pm$ 0.082)                                     | 0.69 ( $\pm$ 0.045) | 0.021   | <b>0.030*</b>    |
| <i>Thalamo-premotor Left</i>             | 0.40 ( $\pm$ 0.037)   | 0.41 ( $\pm$ 0.028) | 0.045   | 0.067            | 0.72 ( $\pm$ 0.098)                                     | 0.69 ( $\pm$ 0.047) | 0.010   | <b>0.022*</b>    |
| <i>Thalamo-precentral Right</i>          | 0.43 ( $\pm$ 0.033)   | 0.44 ( $\pm$ 0.018) | 0.090   | 0.118            | 0.70 ( $\pm$ 0.059)                                     | 0.69 ( $\pm$ 0.027) | 0.022   | <b>0.030*</b>    |
| <i>Thalamo-precentral Left</i>           | 0.44 ( $\pm$ 0.035)   | 0.44 ( $\pm$ 0.028) | 0.322   | 0.332            | 0.69 ( $\pm$ 0.062)                                     | 0.68 ( $\pm$ 0.038) | 0.019   | <b>0.030*</b>    |
| <i>Thalamo-postcentral Right</i>         | 0.44 ( $\pm$ 0.028)   | 0.45 ( $\pm$ 0.028) | 0.149   | 0.174            | 0.71 ( $\pm$ 0.052)                                     | 0.70 ( $\pm$ 0.028) | 0.002   | <b>0.017*</b>    |
| <i>Thalamo-postcentral Left</i>          | 0.43 ( $\pm$ 0.033)   | 0.43 ( $\pm$ 0.026) | 0.434   | 0.434            | 0.71 ( $\pm$ 0.050)                                     | 0.69 ( $\pm$ 0.028) | 0.003   | <b>0.017*</b>    |
| <i>Thalamo-parietal Right</i>            | 0.40 ( $\pm$ 0.034)   | 0.41 ( $\pm$ 0.027) | 0.010   | <b>0.041*</b>    | 0.79 ( $\pm$ 0.079)                                     | 0.75 ( $\pm$ 0.028) | 0.005   | <b>0.017*</b>    |
| <i>Thalamo-parietal Left</i>             | 0.40 ( $\pm$ 0.033)   | 0.42 ( $\pm$ 0.026) | 0.021   | <b>0.048*</b>    | 0.76 ( $\pm$ 0.075)                                     | 0.74 ( $\pm$ 0.020) | 0.006   | <b>0.017*</b>    |
| <i>Thalamo-occipital Right</i>           | 0.38 ( $\pm$ 0.038)   | 0.39 ( $\pm$ 0.028) | 0.003   | <b>0.041*</b>    | 0.84 ( $\pm$ 0.11)                                      | 0.80 ( $\pm$ 0.043) | 0.003   | <b>0.017*</b>    |
| <i>Thalamo-occipital Left</i>            | 0.37 ( $\pm$ 0.034)   | 0.38 ( $\pm$ 0.038) | 0.086   | 0.115            | 0.82 ( $\pm$ 0.10)                                      | 0.80 ( $\pm$ 0.040) | 0.004   | <b>0.017*</b>    |
| <i>Superior Thalamic Radiation Right</i> | 0.45 ( $\pm$ 0.036)   | 0.47 ( $\pm$ 0.025) | 0.078   | 0.106            | 0.69 ( $\pm$ 0.064)                                     | 0.67 ( $\pm$ 0.027) | 0.003   | <b>0.017*</b>    |
| <i>Superior Thalamic Radiation Left</i>  | 0.46 ( $\pm$ 0.042)   | 0.47 ( $\pm$ 0.049) | 0.292   | 0.316            | 0.69 ( $\pm$ 0.057)                                     | 0.67 ( $\pm$ 0.039) | 0.003   | <b>0.017*</b>    |
| <i>Anterior Thalamic Radiation Right</i> | 0.35 ( $\pm$ 0.042)   | 0.36 ( $\pm$ 0.030) | 0.027   | 0.051            | 0.77 ( $\pm$ 0.11)                                      | 0.74 ( $\pm$ 0.043) | 0.010   | <b>0.022*</b>    |
| <i>Anterior Thalamic Radiation Left</i>  | 0.36 ( $\pm$ 0.040)   | 0.37 ( $\pm$ 0.024) | 0.028   | 0.051            | 0.77 ( $\pm$ 0.11)                                      | 0.74 ( $\pm$ 0.038) | 0.009   | <b>0.022*</b>    |



**Supplementary Table S3: Fractional anisotropy and mean diffusivity for the striatal fibre tracts and brainstem tracts for patients ~6 months after TBI compared to trauma controls.**

All data reported as median (IQR). Adjusted p-values (Benjamini & Hochberg Correction) are significant if <0.05. Significant values are shown in bold with \*

|                                           | Fractional Anisotropy |                     |         |                  | Mean Diffusivity ( $\times 10^{-3}$ mm <sup>2</sup> /s) |                     |         |                  |
|-------------------------------------------|-----------------------|---------------------|---------|------------------|---------------------------------------------------------|---------------------|---------|------------------|
|                                           | Controls              | Patients            | P-value | Adjusted P-Value | Controls                                                | Patients            | P-value | Adjusted P-Value |
| <b>Striatal Fibres</b>                    |                       |                     |         |                  |                                                         |                     |         |                  |
| <i>Striato-fronto-orbital Right</i>       | 0.35 ( $\pm$ 0.051)   | 0.37 ( $\pm$ 0.031) | 0.010   | <b>0.041*</b>    | 0.78 ( $\pm$ 0.079)                                     | 0.76 ( $\pm$ 0.028) | 0.002   | <b>0.017*</b>    |
| <i>Striato-fronto-orbital Left</i>        | 0.36 ( $\pm$ 0.051)   | 0.38 ( $\pm$ 0.026) | 0.011   | <b>0.041*</b>    | 0.79 ( $\pm$ 0.091)                                     | 0.75 ( $\pm$ 0.043) | 0.003   | <b>0.017*</b>    |
| <i>Striato-prefrontal Right</i>           | 0.36 ( $\pm$ 0.041)   | 0.37 ( $\pm$ 0.024) | 0.025   | 0.051            | 0.76 ( $\pm$ 0.079)                                     | 0.74 ( $\pm$ 0.030) | 0.019   | <b>0.030*</b>    |
| <i>Striato-prefrontal Left</i>            | 0.36 ( $\pm$ 0.040)   | 0.38 ( $\pm$ 0.026) | 0.018   | <b>0.046*</b>    | 0.77 ( $\pm$ 0.098)                                     | 0.74 ( $\pm$ 0.025) | 0.013   | <b>0.024*</b>    |
| <i>Striato-premotor Right</i>             | 0.40 ( $\pm$ 0.038)   | 0.41 ( $\pm$ 0.037) | 0.098   | 0.124            | 0.72 ( $\pm$ 0.085)                                     | 0.70 ( $\pm$ 0.039) | 0.073   | 0.077            |
| <i>Striato-premotor Left</i>              | 0.39 ( $\pm$ 0.037)   | 0.40 ( $\pm$ 0.031) | 0.044   | 0.067            | 0.74 ( $\pm$ 0.092)                                     | 0.71 ( $\pm$ 0.033) | 0.011   | <b>0.022*</b>    |
| <i>Striato-precentral Right</i>           | 0.42 ( $\pm$ 0.038)   | 0.43 ( $\pm$ 0.019) | 0.108   | 0.134            | 0.71 ( $\pm$ 0.066)                                     | 0.69 ( $\pm$ 0.026) | 0.022   | <b>0.030*</b>    |
| <i>Striato-precentral Left</i>            | 0.42 ( $\pm$ 0.032)   | 0.43 ( $\pm$ 0.025) | 0.141   | 0.169            | 0.72 ( $\pm$ 0.071)                                     | 0.70 ( $\pm$ 0.033) | 0.009   | <b>0.022*</b>    |
| <i>Striato-postcentral Right</i>          | 0.42 ( $\pm$ 0.027)   | 0.43 ( $\pm$ 0.026) | 0.031   | 0.054            | 0.72 ( $\pm$ 0.064)                                     | 0.70 ( $\pm$ 0.033) | 0.005   | <b>0.017*</b>    |
| <i>Striato-postcentral Left</i>           | 0.42 ( $\pm$ 0.028)   | 0.43 ( $\pm$ 0.024) | 0.180   | 0.201            | 0.71 ( $\pm$ 0.058)                                     | 0.69 ( $\pm$ 0.027) | 0.003   | <b>0.017*</b>    |
| <i>Striato-parietal Right</i>             | 0.40 ( $\pm$ 0.037)   | 0.41 ( $\pm$ 0.027) | 0.009   | <b>0.041*</b>    | 0.78 ( $\pm$ 0.077)                                     | 0.74 ( $\pm$ 0.021) | 0.008   | <b>0.022*</b>    |
| <i>Striato-parietal Left</i>              | 0.40 ( $\pm$ 0.031)   | 0.41 ( $\pm$ 0.030) | 0.011   | <b>0.041*</b>    | 0.76 ( $\pm$ 0.062)                                     | 0.73 ( $\pm$ 0.022) | 0.008   | <b>0.022*</b>    |
| <i>Striato-occipital Right</i>            | 0.37 ( $\pm$ 0.038)   | 0.38 ( $\pm$ 0.025) | 0.005   | <b>0.041*</b>    | 0.83 ( $\pm$ 0.111)                                     | 0.80 ( $\pm$ 0.033) | 0.004   | <b>0.017*</b>    |
| <i>Striato-occipital Left</i>             | 0.37 ( $\pm$ 0.035)   | 0.39 ( $\pm$ 0.037) | 0.051   | 0.072            | 0.82 ( $\pm$ 0.089)                                     | 0.79 ( $\pm$ 0.028) | 0.005   | <b>0.017*</b>    |
| <b>Brainstem</b>                          |                       |                     |         |                  |                                                         |                     |         |                  |
| <i>Parieto Occipital pontine Right</i>    | 0.45 ( $\pm$ 0.030)   | 0.46 ( $\pm$ 0.026) | 0.012   | <b>0.041*</b>    | 0.76 ( $\pm$ 0.060)                                     | 0.73 ( $\pm$ 0.029) | 0.006   | <b>0.017*</b>    |
| <i>Parieto Occipital pontine Left</i>     | 0.45 ( $\pm$ 0.028)   | 0.47 ( $\pm$ 0.021) | 0.028   | 0.051            | 0.74 ( $\pm$ 0.051)                                     | 0.71 ( $\pm$ 0.026) | 0.003   | <b>0.017*</b>    |
| <i>Fronto-pontine tract Right</i>         | 0.44 ( $\pm$ 0.034)   | 0.45 ( $\pm$ 0.030) | 0.024   | 0.051            | 0.73 ( $\pm$ 0.070)                                     | 0.71 ( $\pm$ 0.025) | 0.016   | <b>0.027*</b>    |
| <i>Fronto-pontine tract Left</i>          | 0.45 ( $\pm$ 0.030)   | 0.45 ( $\pm$ 0.043) | 0.045   | 0.067            | 0.73 ( $\pm$ 0.063)                                     | 0.71 ( $\pm$ 0.041) | 0.013   | <b>0.024*</b>    |
| <i>Superior cerebellar peduncle Right</i> | 0.42 ( $\pm$ 0.032)   | 0.43 ( $\pm$ 0.020) | 0.076   | 0.106            | 0.70 ( $\pm$ 0.057)                                     | 0.69 ( $\pm$ 0.042) | 0.038   | <b>0.043*</b>    |
| <i>Superior cerebellar peduncle Left</i>  | 0.44 ( $\pm$ 0.030)   | 0.44 ( $\pm$ 0.020) | 0.419   | 0.426            | 0.70 ( $\pm$ 0.051)                                     | 0.68 ( $\pm$ 0.024) | 0.064   | 0.070            |
| <i>Inferior cerebellar peduncle Right</i> | 0.38 ( $\pm$ 0.038)   | 0.38 ( $\pm$ 0.031) | 0.140   | 0.169            | 0.69 ( $\pm$ 0.054)                                     | 0.68 ( $\pm$ 0.036) | 0.269   | 0.269            |
| <i>Inferior cerebellar peduncle Left</i>  | 0.41 ( $\pm$ 0.031)   | 0.41 ( $\pm$ 0.023) | 0.307   | 0.326            | 0.68 ( $\pm$ 0.046)                                     | 0.67 ( $\pm$ 0.026) | 0.116   | 0.120            |
| <i>Middle cerebellar peduncle</i>         | 0.42 ( $\pm$ 0.026)   | 0.43 ( $\pm$ 0.020) | 0.180   | 0.201            | 0.68 ( $\pm$ 0.050)                                     | 0.67 ( $\pm$ 0.019) | 0.122   | 0.124            |

**Supplementary Table S4: Fractional anisotropy and mean diffusivity for the association tracts for patients ~6 months after TBI compared to trauma controls. All data reported as median (IQR). Adjusted p-values (Benjamini & Hochberg Correction) are significant if <0.05. Significant values are shown in bold with \***

|                                                 | Fractional Anisotropy |                     |         | Adjusted P-Value | Mean Diffusivity ( $\times 10^{-3}$ mm <sup>2</sup> /s) |                     |         | Adjusted P-Value |
|-------------------------------------------------|-----------------------|---------------------|---------|------------------|---------------------------------------------------------|---------------------|---------|------------------|
|                                                 | Controls              | Patients            | P-value |                  | Controls                                                | Patients            | P-value |                  |
| <b>Association Fibres</b>                       |                       |                     |         |                  |                                                         |                     |         |                  |
| <i>Superior longitudinal fascicle I Right</i>   | 0.41 ( $\pm$ 0.041)   | 0.43 ( $\pm$ 0.025) | 0.016   | <b>0.046*</b>    | 0.73 ( $\pm$ 0.065)                                     | 0.71 ( $\pm$ 0.039) | 0.039   | <b>0.044*</b>    |
| <i>Superior longitudinal fascicle I Left</i>    | 0.42 ( $\pm$ 0.043)   | 0.43 ( $\pm$ 0.034) | 0.017   | <b>0.046*</b>    | 0.71 ( $\pm$ 0.059)                                     | 0.69 ( $\pm$ 0.047) | 0.030   | <b>0.038*</b>    |
| <i>Superior longitudinal fascicle II Right</i>  | 0.38 ( $\pm$ 0.049)   | 0.39 ( $\pm$ 0.018) | 0.047   | 0.068            | 0.73 ( $\pm$ 0.069)                                     | 0.71 ( $\pm$ 0.033) | 0.031   | <b>0.038*</b>    |
| <i>Superior longitudinal fascicle II Left</i>   | 0.39 ( $\pm$ 0.039)   | 0.40 ( $\pm$ 0.019) | 0.007   | <b>0.041*</b>    | 0.72 ( $\pm$ 0.059)                                     | 0.71 ( $\pm$ 0.041) | 0.020   | <b>0.030*</b>    |
| <i>Superior longitudinal fascicle III Right</i> | 0.37 ( $\pm$ 0.054)   | 0.39 ( $\pm$ 0.024) | 0.041   | 0.067            | 0.73 ( $\pm$ 0.079)                                     | 0.71 ( $\pm$ 0.031) | 0.031   | <b>0.038*</b>    |
| <i>Superior longitudinal fascicle III Left</i>  | 0.40 ( $\pm$ 0.046)   | 0.41 ( $\pm$ 0.034) | 0.010   | <b>0.041*</b>    | 0.71 ( $\pm$ 0.066)                                     | 0.70 ( $\pm$ 0.046) | 0.019   | <b>0.030*</b>    |
| <i>Inferior longitudinal fascicle Right</i>     | 0.36 ( $\pm$ 0.048)   | 0.38 ( $\pm$ 0.034) | 0.020   | <b>0.047*</b>    | 0.79 ( $\pm$ 0.097)                                     | 0.76 ( $\pm$ 0.046) | 0.029   | <b>0.038*</b>    |
| <i>Inferior longitudinal fascicle Left</i>      | 0.36 ( $\pm$ 0.043)   | 0.38 ( $\pm$ 0.032) | 0.017   | <b>0.046*</b>    | 0.79 ( $\pm$ 0.086)                                     | 0.77 ( $\pm$ 0.039) | 0.011   | <b>0.022*</b>    |
| <i>Uncinate fascicle Right</i>                  | 0.32 ( $\pm$ 0.043)   | 0.33 ( $\pm$ 0.031) | 0.041   | 0.067            | 0.79 ( $\pm$ 0.067)                                     | 0.78 ( $\pm$ 0.034) | 0.037   | <b>0.043*</b>    |
| <i>Uncinate fascicle Left</i>                   | 0.35 ( $\pm$ 0.045)   | 0.36 ( $\pm$ 0.043) | 0.156   | 0.180            | 0.78 ( $\pm$ 0.084)                                     | 0.76 ( $\pm$ 0.038) | 0.070   | 0.076            |
| <i>Arcuate fascicle Right</i>                   | 0.37 ( $\pm$ 0.049)   | 0.38 ( $\pm$ 0.027) | 0.040   | 0.067            | 0.74 ( $\pm$ 0.074)                                     | 0.71 ( $\pm$ 0.034) | 0.021   | <b>0.030*</b>    |
| <i>Arcuate fascicle Left</i>                    | 0.36 ( $\pm$ 0.043)   | 0.38 ( $\pm$ 0.024) | 0.015   | <b>0.046*</b>    | 0.73 ( $\pm$ 0.066)                                     | 0.72 ( $\pm$ 0.047) | 0.020   | <b>0.030*</b>    |
| <i>Cingulum Right</i>                           | 0.37 ( $\pm$ 0.041)   | 0.38 ( $\pm$ 0.021) | 0.021   | <b>0.048*</b>    | 0.75 ( $\pm$ 0.061)                                     | 0.73 ( $\pm$ 0.030) | 0.037   | <b>0.043*</b>    |
| <i>Cingulum Left</i>                            | 0.38 ( $\pm$ 0.044)   | 0.40 ( $\pm$ 0.024) | 0.006   | <b>0.041*</b>    | 0.74 ( $\pm$ 0.058)                                     | 0.73 ( $\pm$ 0.028) | 0.023   | <b>0.030*</b>    |
| <i>Middle longitudinal fascicle Right</i>       | 0.36 ( $\pm$ 0.045)   | 0.38 ( $\pm$ 0.030) | 0.015   | <b>0.046*</b>    | 0.78 ( $\pm$ 0.077)                                     | 0.75 ( $\pm$ 0.027) | 0.012   | <b>0.022*</b>    |
| <i>Middle longitudinal fascicle Left</i>        | 0.36 ( $\pm$ 0.039)   | 0.38 ( $\pm$ 0.023) | 0.010   | <b>0.041*</b>    | 0.76 ( $\pm$ 0.067)                                     | 0.74 ( $\pm$ 0.040) | 0.009   | <b>0.022*</b>    |
| <i>Inferior occipito-frontal fascicle Right</i> | 0.33 ( $\pm$ 0.038)   | 0.35 ( $\pm$ 0.021) | 0.011   | <b>0.041*</b>    | 0.84 ( $\pm$ 0.11)                                      | 0.80 ( $\pm$ 0.033) | 0.004   | <b>0.017*</b>    |
| <i>Inferior occipito-frontal fascicle Left</i>  | 0.35 ( $\pm$ 0.037)   | 0.36 ( $\pm$ 0.023) | 0.019   | <b>0.047*</b>    | 0.82 ( $\pm$ 0.10)                                      | 0.78 ( $\pm$ 0.032) | 0.012   | <b>0.022*</b>    |
| <i>Optic Radiation Right</i>                    | 0.39 ( $\pm$ 0.039)   | 0.41 ( $\pm$ 0.030) | 0.004   | <b>0.041*</b>    | 0.83 ( $\pm$ 0.11)                                      | 0.79 ( $\pm$ 0.037) | 0.003   | <b>0.017*</b>    |
| <i>Optic Radiation Left</i>                     | 0.37 ( $\pm$ 0.036)   | 0.38 ( $\pm$ 0.035) | 0.097   | 0.124            | 0.82 ( $\pm$ 0.097)                                     | 0.79 ( $\pm$ 0.041) | 0.004   | <b>0.017*</b>    |

**Supplementary Table S5: Fractional anisotropy and mean diffusivity for the projection fibre tracts, commissural fibre tracts and thalamic radiations for patients >5 years after TBI.**

All data reported as median (IQR). Adjusted p-values (Benjamini & Hochberg Correction) are significant if <0.05. Significant values are shown in bold with \*

|                                          | Fractional Anisotropy |                     |         |                  | Mean Diffusivity ( $\times 10^{-3}$ mm <sup>2</sup> /s) |                     |         |                  |
|------------------------------------------|-----------------------|---------------------|---------|------------------|---------------------------------------------------------|---------------------|---------|------------------|
|                                          | Controls              | Patients            | P-value | Adjusted P-Value | Controls                                                | Patients            | P-value | Adjusted P-Value |
| <b>Projection Fibres</b>                 |                       |                     |         |                  |                                                         |                     |         |                  |
| <i>Corticospinal tract Right</i>         | 0.45 ( $\pm$ 0.034)   | 0.46 ( $\pm$ 0.029) | 0.546   | 0.581            | 0.57 ( $\pm$ 0.017)                                     | 0.58 ( $\pm$ 0.022) | 0.021   | <b>0.026*</b>    |
| <i>Corticospinal tract Left</i>          | 0.45 ( $\pm$ 0.030)   | 0.46 ( $\pm$ 0.031) | 0.608   | 0.636            | 0.57 ( $\pm$ 0.017)                                     | 0.57 ( $\pm$ 0.029) | 0.209   | 0.230            |
| <b>Commissural Fibres</b>                |                       |                     |         |                  |                                                         |                     |         |                  |
| <i>CC Genu</i>                           | 0.37 ( $\pm$ 0.013)   | 0.35 ( $\pm$ 0.038) | <0.001  | <b>0.011*</b>    | 0.62 ( $\pm$ 0.017)                                     | 0.65 ( $\pm$ 0.036) | <0.001  | <0.001*          |
| <i>CC Body</i>                           | 0.41 ( $\pm$ 0.018)   | 0.40 ( $\pm$ 0.031) | 0.003   | <b>0.014*</b>    | 0.61 ( $\pm$ 0.014)                                     | 0.62 ( $\pm$ 0.034) | 0.001   | <b>0.004*</b>    |
| <i>Splenium</i>                          | 0.38 ( $\pm$ 0.012)   | 0.36 ( $\pm$ 0.029) | 0.004   | <b>0.018*</b>    | 0.63 ( $\pm$ 0.0090)                                    | 0.64 ( $\pm$ 0.028) | <0.001  | <b>0.001*</b>    |
| <i>Commissure Anterior</i>               | 0.33 ( $\pm$ 0.022)   | 0.31 ( $\pm$ 0.037) | 0.006   | <b>0.019*</b>    | 0.64 ( $\pm$ 0.020)                                     | 0.65 ( $\pm$ 0.049) | 0.090   | 0.102            |
| <i>Fornix Right</i>                      | 0.52 ( $\pm$ 0.042)   | 0.49 ( $\pm$ 0.079) | 0.037   | 0.057            | 0.78 ( $\pm$ 0.038)                                     | 0.80 ( $\pm$ 0.083) | 0.109   | 0.121            |
| <i>Fornix Left</i>                       | 0.51 ( $\pm$ 0.043)   | 0.48 ( $\pm$ 0.093) | <0.001  | <b>0.011*</b>    | 0.80 ( $\pm$ 0.042)                                     | 0.87 ( $\pm$ 0.096) | <0.001  | <b>0.001*</b>    |
| <b>Thalamic Radiations</b>               |                       |                     |         |                  |                                                         |                     |         |                  |
| <i>Thalamo-prefrontal Right</i>          | 0.37 ( $\pm$ 0.017)   | 0.36 ( $\pm$ 0.028) | 0.007   | <b>0.019*</b>    | 0.61 ( $\pm$ 0.020)                                     | 0.63 ( $\pm$ 0.030) | 0.000   | <0.001*          |
| <i>Thalamo-prefrontal Left</i>           | 0.38 ( $\pm$ 0.017)   | 0.36 ( $\pm$ 0.029) | 0.005   | <b>0.019*</b>    | 0.60 ( $\pm$ 0.018)                                     | 0.61 ( $\pm$ 0.030) | 0.002   | <b>0.004*</b>    |
| <i>Thalamo-premotor Right</i>            | 0.41 ( $\pm$ 0.021)   | 0.40 ( $\pm$ 0.029) | 0.075   | 0.107            | 0.59 ( $\pm$ 0.021)                                     | 0.60 ( $\pm$ 0.029) | <0.001  | <b>0.002*</b>    |
| <i>Thalamo-premotor Left</i>             | 0.40 ( $\pm$ 0.022)   | 0.39 ( $\pm$ 0.023) | 0.013   | <b>0.026*</b>    | 0.59 ( $\pm$ 0.017)                                     | 0.60 ( $\pm$ 0.027) | 0.002   | <b>0.005*</b>    |
| <i>Thalamo-precentral Right</i>          | 0.41 ( $\pm$ 0.029)   | 0.41 ( $\pm$ 0.031) | 0.182   | 0.222            | 0.58 ( $\pm$ 0.018)                                     | 0.59 ( $\pm$ 0.027) | 0.013   | <b>0.017*</b>    |
| <i>Thalamo-precentral Left</i>           | 0.42 ( $\pm$ 0.031)   | 0.41 ( $\pm$ 0.030) | 0.080   | 0.112            | 0.58 ( $\pm$ 0.012)                                     | 0.59 ( $\pm$ 0.032) | 0.022   | <b>0.026*</b>    |
| <i>Thalamo-postcentral Right</i>         | 0.41 ( $\pm$ 0.037)   | 0.41 ( $\pm$ 0.034) | 0.389   | 0.427            | 0.58 ( $\pm$ 0.016)                                     | 0.59 ( $\pm$ 0.030) | 0.037   | <b>0.044*</b>    |
| <i>Thalamo-postcentral Left</i>          | 0.40 ( $\pm$ 0.034)   | 0.40 ( $\pm$ 0.027) | 0.297   | 0.343            | 0.59 ( $\pm$ 0.021)                                     | 0.60 ( $\pm$ 0.033) | 0.074   | 0.085            |
| <i>Thalamo-parietal Right</i>            | 0.40 ( $\pm$ 0.026)   | 0.39 ( $\pm$ 0.026) | 0.008   | <b>0.019*</b>    | 0.61 ( $\pm$ 0.0095)                                    | 0.63 ( $\pm$ 0.029) | <0.001  | <b>0.001*</b>    |
| <i>Thalamo-parietal Left</i>             | 0.40 ( $\pm$ 0.026)   | 0.38 ( $\pm$ 0.028) | 0.028   | <b>0.045*</b>    | 0.62 ( $\pm$ 0.011)                                     | 0.63 ( $\pm$ 0.029) | 0.001   | <b>0.003*</b>    |
| <i>Thalamo-occipital Right</i>           | 0.38 ( $\pm$ 0.023)   | 0.36 ( $\pm$ 0.030) | <0.001  | <b>0.011*</b>    | 0.63 ( $\pm$ 0.014)                                     | 0.64 ( $\pm$ 0.028) | 0.001   | <b>0.003*</b>    |
| <i>Thalamo-occipital Left</i>            | 0.37 ( $\pm$ 0.015)   | 0.36 ( $\pm$ 0.024) | 0.012   | <b>0.026*</b>    | 0.63 ( $\pm$ 0.017)                                     | 0.64 ( $\pm$ 0.038) | 0.014   | <b>0.018*</b>    |
| <i>Superior Thalamic Radiation Right</i> | 0.43 ( $\pm$ 0.036)   | 0.42 ( $\pm$ 0.037) | 0.154   | 0.195            | 0.58 ( $\pm$ 0.017)                                     | 0.59 ( $\pm$ 0.026) | 0.005   | <b>0.009*</b>    |
| <i>Superior Thalamic Radiation Left</i>  | 0.44 ( $\pm$ 0.036)   | 0.43 ( $\pm$ 0.039) | 0.198   | 0.237            | 0.57 ( $\pm$ 0.012)                                     | 0.58 ( $\pm$ 0.030) | 0.008   | <b>0.012*</b>    |
| <i>Anterior Thalamic Radiation Right</i> | 0.35 ( $\pm$ 0.019)   | 0.34 ( $\pm$ 0.031) | 0.061   | 0.089            | 0.61 ( $\pm$ 0.016)                                     | 0.62 ( $\pm$ 0.030) | <0.001  | <b>0.001*</b>    |
| <i>Anterior Thalamic Radiation Left</i>  | 0.35 ( $\pm$ 0.011)   | 0.34 ( $\pm$ 0.028) | 0.018   | <b>0.033*</b>    | 0.61 ( $\pm$ 0.017)                                     | 0.62 ( $\pm$ 0.025) | 0.008   | <b>0.012*</b>    |

**Supplementary Table S6: Fractional anisotropy and mean diffusivity for the striatal fibre tracts and brainstem tracts. All data reported as median (IQR) radiations for patients >5 years after TBI. Adjusted p-values (Benjamini & Hochberg Correction) are significant if <0.05. Significant values are shown in bold with \***

|                                           | Fractional Anisotropy |                     |         |                  | Mean Diffusivity ( $\times 10^{-3}$ mm <sup>2</sup> /s) |                     |         |                  |
|-------------------------------------------|-----------------------|---------------------|---------|------------------|---------------------------------------------------------|---------------------|---------|------------------|
|                                           | Controls              | Patients            | P-value | Adjusted P-Value | Controls                                                | Patients            | P-value | Adjusted P-Value |
| <b>Striatal Fibres</b>                    |                       |                     |         |                  |                                                         |                     |         |                  |
| <i>Striato-fronto-orbital Right</i>       | 0.35 ( $\pm$ 0.026)   | 0.34 ( $\pm$ 0.048) | 0.008   | <b>0.019*</b>    | 0.61 ( $\pm$ 0.022)                                     | 0.63 ( $\pm$ 0.040) | 0.005   | <b>0.009*</b>    |
| <i>Striato-fronto-orbital Left</i>        | 0.35 ( $\pm$ 0.020)   | 0.33 ( $\pm$ 0.042) | 0.056   | 0.084            | 0.61 ( $\pm$ 0.019)                                     | 0.62 ( $\pm$ 0.049) | 0.263   | 0.284            |
| <i>Striato-prefrontal Right</i>           | 0.36 ( $\pm$ 0.017)   | 0.35 ( $\pm$ 0.029) | 0.006   | <b>0.019*</b>    | 0.61 ( $\pm$ 0.020)                                     | 0.63 ( $\pm$ 0.035) | <0.001  | <0.001*          |
| <i>Striato-prefrontal Left</i>            | 0.36 ( $\pm$ 0.017)   | 0.34 ( $\pm$ 0.034) | 0.025   | <b>0.042*</b>    | 0.61 ( $\pm$ 0.016)                                     | 0.62 ( $\pm$ 0.029) | 0.003   | <b>0.006*</b>    |
| <i>Striato-premotor Right</i>             | 0.41 ( $\pm$ 0.025)   | 0.40 ( $\pm$ 0.030) | 0.112   | 0.150            | 0.58 ( $\pm$ 0.026)                                     | 0.60 ( $\pm$ 0.024) | <0.001  | <b>0.001*</b>    |
| <i>Striato-premotor Left</i>              | 0.40 ( $\pm$ 0.022)   | 0.38 ( $\pm$ 0.029) | 0.007   | <b>0.019*</b>    | 0.59 ( $\pm$ 0.018)                                     | 0.60 ( $\pm$ 0.028) | 0.002   | <b>0.005*</b>    |
| <i>Striato-precentral Right</i>           | 0.41 ( $\pm$ 0.026)   | 0.40 ( $\pm$ 0.025) | 0.173   | 0.214            | 0.58 ( $\pm$ 0.022)                                     | 0.59 ( $\pm$ 0.026) | 0.007   | <b>0.011*</b>    |
| <i>Striato-precentral Left</i>            | 0.41 ( $\pm$ 0.027)   | 0.39 ( $\pm$ 0.030) | 0.025   | <b>0.042*</b>    | 0.58 ( $\pm$ 0.012)                                     | 0.59 ( $\pm$ 0.034) | 0.018   | <b>0.023*</b>    |
| <i>Striato-postcentral Right</i>          | 0.41 ( $\pm$ 0.032)   | 0.40 ( $\pm$ 0.029) | 0.304   | 0.345            | 0.58 ( $\pm$ 0.018)                                     | 0.60 ( $\pm$ 0.030) | 0.010   | <b>0.015*</b>    |
| <i>Striato-postcentral Left</i>           | 0.40 ( $\pm$ 0.032)   | 0.39 ( $\pm$ 0.027) | 0.133   | 0.175            | 0.59 ( $\pm$ 0.018)                                     | 0.60 ( $\pm$ 0.033) | 0.065   | 0.076            |
| <i>Striato-parietal Right</i>             | 0.40 ( $\pm$ 0.028)   | 0.39 ( $\pm$ 0.027) | 0.008   | <b>0.019*</b>    | 0.61 ( $\pm$ 0.013)                                     | 0.63 ( $\pm$ 0.029) | <0.001  | < <b>0.001*</b>  |
| <i>Striato-parietal Left</i>              | 0.39 ( $\pm$ 0.024)   | 0.38 ( $\pm$ 0.028) | 0.012   | <b>0.026*</b>    | 0.62 ( $\pm$ 0.012)                                     | 0.63 ( $\pm$ 0.029) | 0.002   | <b>0.004*</b>    |
| <i>Striato-occipital Right</i>            | 0.37 ( $\pm$ 0.022)   | 0.35 ( $\pm$ 0.026) | 0.000   | <b>0.007*</b>    | 0.63 ( $\pm$ 0.016)                                     | 0.64 ( $\pm$ 0.028) | 0.002   | <b>0.005*</b>    |
| <i>Striato-occipital Left</i>             | 0.38 ( $\pm$ 0.018)   | 0.36 ( $\pm$ 0.026) | 0.001   | <b>0.011*</b>    | 0.63 ( $\pm$ 0.018)                                     | 0.64 ( $\pm$ 0.034) | 0.017   | <b>0.021*</b>    |
| <b>Brainstem</b>                          |                       |                     |         |                  |                                                         |                     |         |                  |
| <i>Parieto Occipital pontine Right</i>    | 0.43 ( $\pm$ 0.032)   | 0.43 ( $\pm$ 0.029) | 0.037   | 0.057            | 0.60 ( $\pm$ 0.011)                                     | 0.62 ( $\pm$ 0.031) | <0.001  | <b>0.002*</b>    |
| <i>Parieto Occipital pontine Left</i>     | 0.43 ( $\pm$ 0.029)   | 0.42 ( $\pm$ 0.027) | 0.145   | 0.187            | 0.60 ( $\pm$ 0.012)                                     | 0.61 ( $\pm$ 0.027) | 0.012   | <b>0.017*</b>    |
| <i>Fronto-pontine tract Right</i>         | 0.42 ( $\pm$ 0.026)   | 0.41 ( $\pm$ 0.032) | 0.043   | 0.065            | 0.59 ( $\pm$ 0.016)                                     | 0.61 ( $\pm$ 0.027) | <0.001  | <b>0.001*</b>    |
| <i>Fronto-pontine tract Left</i>          | 0.43 ( $\pm$ 0.028)   | 0.42 ( $\pm$ 0.032) | 0.107   | 0.147            | 0.59 ( $\pm$ 0.015)                                     | 0.60 ( $\pm$ 0.032) | 0.007   | <b>0.011*</b>    |
| <i>Superior cerebellar peduncle Right</i> | 0.38 ( $\pm$ 0.022)   | 0.38 ( $\pm$ 0.029) | 0.729   | 0.751            | 0.57 ( $\pm$ 0.027)                                     | 0.57 ( $\pm$ 0.017) | 0.994   | 0.994            |
| <i>Superior cerebellar peduncle Left</i>  | 0.39 ( $\pm$ 0.020)   | 0.39 ( $\pm$ 0.023) | 0.833   | 0.833            | 0.57 ( $\pm$ 0.025)                                     | 0.57 ( $\pm$ 0.018) | 0.654   | 0.695            |
| <i>Inferior cerebellar peduncle Right</i> | 0.34 ( $\pm$ 0.019)   | 0.34 ( $\pm$ 0.028) | 0.364   | 0.407            | 0.56 ( $\pm$ 0.026)                                     | 0.57 ( $\pm$ 0.019) | 0.687   | 0.719            |
| <i>Inferior cerebellar peduncle Left</i>  | 0.37 ( $\pm$ 0.021)   | 0.37 ( $\pm$ 0.021) | 0.774   | 0.786            | 0.56 ( $\pm$ 0.022)                                     | 0.57 ( $\pm$ 0.015) | 0.879   | 0.892            |
| <i>Middle cerebellar peduncle</i>         | 0.36 ( $\pm$ 0.024)   | 0.36 ( $\pm$ 0.024) | 0.450   | 0.486            | 0.56 ( $\pm$ 0.023)                                     | 0.56 ( $\pm$ 0.017) | 0.843   | 0.869            |

**Supplementary Table S7: Fractional anisotropy and mean diffusivity for the association tracts radiations for patients >5 years after TBI.** All data reported as median (IQR). Adjusted p-values (Benjamini & Hochberg Correction) are significant if <0.05. Significant values are shown in bold with \*

|                                                 | Fractional Anisotropy |                     |         | Adjusted P-Value | Mean Diffusivity ( $\times 10^{-3}$ mm <sup>2</sup> /s) |                     |         | Adjusted P-Value  |
|-------------------------------------------------|-----------------------|---------------------|---------|------------------|---------------------------------------------------------|---------------------|---------|-------------------|
|                                                 | Controls              | Patients            | P-value |                  | Controls                                                | Patients            | P-value |                   |
| <b>Association Fibres</b>                       |                       |                     |         |                  |                                                         |                     |         |                   |
| <i>Superior longitudinal fascicle I Right</i>   | 0.42 ( $\pm$ 0.015)   | 0.40 ( $\pm$ 0.030) | 0.003   | <b>0.016*</b>    | 0.60 ( $\pm$ 0.021)                                     | 0.62 ( $\pm$ 0.031) | <0.001  | <b>0.001*</b>     |
| <i>Superior longitudinal fascicle I Left</i>    | 0.41 ( $\pm$ 0.016)   | 0.40 ( $\pm$ 0.031) | 0.022   | <b>0.039*</b>    | 0.60 ( $\pm$ 0.015)                                     | 0.61 ( $\pm$ 0.035) | 0.002   | <b>0.004*</b>     |
| <i>Superior longitudinal fascicle II Right</i>  | 0.40 ( $\pm$ 0.016)   | 0.38 ( $\pm$ 0.030) | 0.001   | <b>0.011*</b>    | 0.60 ( $\pm$ 0.017)                                     | 0.62 ( $\pm$ 0.032) | <0.001  | <b>0.001*</b>     |
| <i>Superior longitudinal fascicle II Left</i>   | 0.40 ( $\pm$ 0.018)   | 0.39 ( $\pm$ 0.025) | 0.005   | <b>0.019*</b>    | 0.59 ( $\pm$ 0.012)                                     | 0.61 ( $\pm$ 0.030) | 0.001   | <b>0.003*</b>     |
| <i>Superior longitudinal fascicle III Right</i> | 0.37 ( $\pm$ 0.022)   | 0.36 ( $\pm$ 0.027) | 0.002   | <b>0.011*</b>    | 0.59 ( $\pm$ 0.018)                                     | 0.62 ( $\pm$ 0.033) | <0.001  | <b>0.001*</b>     |
| <i>Superior longitudinal fascicle III Left</i>  | 0.38 ( $\pm$ 0.022)   | 0.37 ( $\pm$ 0.030) | 0.005   | <b>0.019*</b>    | 0.59 ( $\pm$ 0.019)                                     | 0.60 ( $\pm$ 0.032) | 0.008   | <b>0.012*</b>     |
| <i>Inferior longitudinal fascicle Right</i>     | 0.36 ( $\pm$ 0.024)   | 0.34 ( $\pm$ 0.032) | 0.006   | <b>0.019*</b>    | 0.63 ( $\pm$ 0.018)                                     | 0.64 ( $\pm$ 0.032) | 0.004   | <b>0.008*</b>     |
| <i>Inferior longitudinal fascicle Left</i>      | 0.36 ( $\pm$ 0.018)   | 0.35 ( $\pm$ 0.029) | 0.013   | <b>0.026*</b>    | 0.62 ( $\pm$ 0.017)                                     | 0.64 ( $\pm$ 0.029) | 0.005   | <b>0.009*</b>     |
| <i>Uncinate fascicle Right</i>                  | 0.31 ( $\pm$ 0.019)   | 0.29 ( $\pm$ 0.041) | 0.002   | <b>0.011*</b>    | 0.64 ( $\pm$ 0.016)                                     | 0.67 ( $\pm$ 0.044) | <0.001  | <b>&lt;0.001*</b> |
| <i>Uncinate fascicle Left</i>                   | 0.33 ( $\pm$ 0.018)   | 0.32 ( $\pm$ 0.049) | 0.290   | 0.340            | 0.64 ( $\pm$ 0.018)                                     | 0.65 ( $\pm$ 0.047) | 0.006   | <b>0.010*</b>     |
| <i>Arcuate fascicle Right</i>                   | 0.36 ( $\pm$ 0.017)   | 0.35 ( $\pm$ 0.027) | 0.007   | <b>0.019*</b>    | 0.61 ( $\pm$ 0.016)                                     | 0.62 ( $\pm$ 0.030) | <0.001  | <b>&lt;0.001*</b> |
| <i>Arcuate fascicle Left</i>                    | 0.61 ( $\pm$ 0.014)   | 0.62 ( $\pm$ 0.030) | 0.005   | <b>0.019*</b>    | 0.61 ( $\pm$ 0.014)                                     | 0.62 ( $\pm$ 0.030) | 0.005   | <b>0.009*</b>     |
| <i>Cingulum Right</i>                           | 0.62 ( $\pm$ 0.019)   | 0.64 ( $\pm$ 0.029) | <0.001  | <b>0.007*</b>    | 0.62 ( $\pm$ 0.019)                                     | 0.64 ( $\pm$ 0.029) | <0.001  | <b>0.001*</b>     |
| <i>Cingulum Left</i>                            | 0.37 ( $\pm$ 0.015)   | 0.35 ( $\pm$ 0.033) | 0.001   | <b>0.011*</b>    | 0.62 ( $\pm$ 0.013)                                     | 0.64 ( $\pm$ 0.035) | <0.001  | <b>0.010*</b>     |
| <i>Middle longitudinal fascicle Right</i>       | 0.37 ( $\pm$ 0.011)   | 0.35 ( $\pm$ 0.023) | 0.009   | <b>0.019*</b>    | 0.63 ( $\pm$ 0.012)                                     | 0.64 ( $\pm$ 0.022) | <0.001  | <b>0.001*</b>     |
| <i>Middle longitudinal fascicle Left</i>        | 0.36 ( $\pm$ 0.011)   | 0.34 ( $\pm$ 0.028) | 0.006   | <b>0.019*</b>    | 0.62 ( $\pm$ 0.011)                                     | 0.64 ( $\pm$ 0.026) | <0.001  | <b>0.001*</b>     |
| <i>Inferior occipito-frontal fascicle Right</i> | 0.33 ( $\pm$ 0.013)   | 0.31 ( $\pm$ 0.028) | <0.001  | <b>0.007*</b>    | 0.64 ( $\pm$ 0.014)                                     | 0.65 ( $\pm$ 0.033) | <0.001  | <b>0.002*</b>     |
| <i>Inferior occipito-frontal fascicle Left</i>  | 0.34 ( $\pm$ 0.014)   | 0.33 ( $\pm$ 0.029) | 0.027   | <b>0.045*</b>    | 0.63 ( $\pm$ 0.016)                                     | 0.64 ( $\pm$ 0.037) | 0.003   | <b>0.006*</b>     |
| <i>Optic Radiation Right</i>                    | 0.39 ( $\pm$ 0.025)   | 0.37 ( $\pm$ 0.031) | 0.002   | <b>0.011*</b>    | 0.62 ( $\pm$ 0.014)                                     | 0.64 ( $\pm$ 0.033) | 0.001   | <b>0.004*</b>     |
| <i>Optic Radiation Left</i>                     | 0.37 ( $\pm$ 0.014)   | 0.36 ( $\pm$ 0.024) | 0.017   | <b>0.032*</b>    | 0.63 ( $\pm$ 0.018)                                     | 0.64 ( $\pm$ 0.036) | 0.012   | <b>0.017*</b>     |

**Supplementary Table S8: Correlations of GFAP with fractional anisotropy and mean diffusivity for projection fibres, commissural fibres and thalamic radiations.**

The R<sup>2</sup> are shown adjusted for age, time since injury and sex. Adjusted p-values (Benjamini & Hochberg Correction) are significant if <0.05. Significant values are shown in bold with \*

| Projection Fibres                        | Trauma Controls ~6months after injury |         |              |                     |         |               | Patients after TBI ~6months after injury |         |                   |                     |          |                   | Patients after TBI >5 years after injury |         |              |                     |         |              |
|------------------------------------------|---------------------------------------|---------|--------------|---------------------|---------|---------------|------------------------------------------|---------|-------------------|---------------------|----------|-------------------|------------------------------------------|---------|--------------|---------------------|---------|--------------|
|                                          | FA                                    |         |              | MD                  |         |               | FA                                       |         |                   | MD                  |          |                   | FA                                       |         |              | MD                  |         |              |
|                                          | Adj. R <sup>2</sup>                   | P-value | Adj. P-Value | Adj. R <sup>2</sup> | P-value | Adj. P-Value  | Adj. R <sup>2</sup>                      | P-value | Adj. P-Value      | Adj. R <sup>2</sup> | P-value  | Adj. P-Value      | Adj. R <sup>2</sup>                      | P-value | Adj. P-Value | Adj. R <sup>2</sup> | P-value | Adj. P-Value |
| <i>Corticospinal tract Right</i>         | -0.09                                 | 0.671   | 0.886        | -0.18               | 0.961   | 0.985         | 0.08                                     | 0.006   | <b>0.007*</b>     | 0.34                | 0.000    | <b>&lt;0.001*</b> | -0.05                                    | 0.626   | 0.891        | 0.16                | 0.071   | 0.748        |
| <i>Corticospinal tract Left</i>          | -0.16                                 | 0.924   | 0.983        | -0.03               | 0.506   | 0.750         | 0.06                                     | 0.020   | <b>0.021*</b>     | 0.25                | 0.000    | <b>&lt;0.001*</b> | -0.05                                    | 0.626   | 0.891        | 0.11                | 0.135   | 0.748        |
| <b>Commissural Fibres</b>                |                                       |         |              |                     |         |               |                                          |         |                   |                     |          | <b>&lt;0.001*</b> |                                          |         |              |                     |         |              |
| <i>CC Genu</i>                           | -0.16                                 | 0.906   | 0.983        | 0.19                | 0.111   | 0.295         | 0.11                                     | 0.001   | <b>0.001*</b>     | 0.39                | 0.000    | <b>&lt;0.001*</b> | 0.07                                     | 0.204   | 0.748        | 0.26                | 0.018   | 0.748        |
| <i>CC Body</i>                           | -0.14                                 | 0.842   | 0.945        | 0.35                | 0.022   | 0.104         | 0.20                                     | 0.000   | <b>&lt;0.001*</b> | 0.50                | <2.2e-16 | <b>&lt;0.001*</b> | 0.11                                     | 0.142   | 0.748        | 0.22                | 0.032   | 0.748        |
| <i>Splenium</i>                          | -0.13                                 | 0.816   | 0.945        | 0.36                | 0.022   | 0.104         | 0.11                                     | 0.001   | <b>0.001*</b>     | 0.40                | 0.000    | <b>&lt;0.001*</b> | 0.12                                     | 0.126   | 0.748        | 0.19                | 0.051   | 0.748        |
| <i>Commissure Anterior</i>               | 0.13                                  | 0.170   | 0.389        | 0.14                | 0.164   | 0.388         | 0.18                                     | 0.000   | <b>&lt;0.001*</b> | 0.28                | 0.000    | <b>&lt;0.001*</b> | -0.02                                    | 0.495   | 0.851        | 0.07                | 0.208   | 0.748        |
| <i>Fornix Right</i>                      | 0.47                                  | 0.006   | 0.077        | 0.36                | 0.022   | 0.104         | 0.27                                     | 0.000   | <b>&lt;0.001*</b> | 0.16                | 0.000    | <b>&lt;0.001*</b> | -0.04                                    | 0.584   | 0.886        | 0.02                | 0.344   | 0.755        |
| <i>Fornix Left</i>                       | 0.45                                  | 0.007   | 0.077        | 0.45                | 0.007   | 0.077         | 0.32                                     | 0.000   | <b>&lt;0.001*</b> | 0.34                | 0.000    | <b>&lt;0.001*</b> | -0.04                                    | 0.584   | 0.886        | -0.05               | 0.626   | 0.891        |
| <b>Thalamic Radiations</b>               |                                       |         |              |                     |         |               |                                          |         |                   |                     |          |                   |                                          |         |              |                     |         |              |
| <i>Thalamo-prefrontal Right</i>          | -0.01                                 | 0.451   | 0.710        | 0.32                | 0.031   | 0.127         | 0.38                                     | 0.000   | <b>&lt;0.001*</b> | 0.33                | 0.000    | <b>&lt;0.001*</b> | 0.18                                     | 0.331   | 0.755        | 0.20                | 0.293   | 0.748        |
| <i>Thalamo-prefrontal Left</i>           | 0.08                                  | 0.249   | 0.468        | 0.50                | 0.004   | 0.070         | 0.31                                     | 0.000   | <b>&lt;0.001*</b> | 0.44                | 0.000    | <b>&lt;0.001*</b> | 0.11                                     | 0.570   | 0.886        | 0.11                | 0.571   | 0.886        |
| <i>Thalamo-premotor Right</i>            | -0.11                                 | 0.742   | 0.927        | 0.41                | 0.011   | 0.077         | 0.24                                     | 0.000   | <b>&lt;0.001*</b> | 0.44                | 0.000    | <b>&lt;0.001*</b> | 0.19                                     | 0.300   | 0.748        | 0.06                | 0.757   | 0.916        |
| <i>Thalamo-premotor Left</i>             | 0.00                                  | 0.429   | 0.694        | 0.57                | 0.001   | 0.066         | 0.22                                     | 0.000   | <b>&lt;0.001*</b> | 0.40                | 0.000    | <b>&lt;0.001*</b> | 0.01                                     | 0.955   | 0.974        | 0.21                | 0.253   | 0.748        |
| <i>Thalamo-precentral Right</i>          | -0.12                                 | 0.790   | 0.945        | 0.13                | 0.179   | 0.396         | 0.21                                     | 0.000   | <b>&lt;0.001*</b> | 0.44                | 0.000    | <b>&lt;0.001*</b> | 0.18                                     | 0.340   | 0.755        | -0.05               | 0.779   | 0.916        |
| <i>Thalamo-precentral Left</i>           | -0.11                                 | 0.767   | 0.938        | 0.41                | 0.012   | 0.080         | 0.11                                     | 0.001   | <b>0.001</b>      | 0.35                | 0.000    | <b>&lt;0.001*</b> | 0.24                                     | 0.189   | 0.748        | -0.05               | 0.793   | 0.916        |
| <i>Thalamo-postcentral Right</i>         | -0.05                                 | 0.555   | 0.800        | -0.11               | 0.752   | 0.929         | 0.00                                     | 0.378   | 0.379             | 0.34                | 0.000    | <b>&lt;0.001*</b> | 0.22                                     | 0.239   | 0.748        | -0.24               | 0.185   | 0.748        |
| <i>Thalamo-postcentral Left</i>          | -0.18                                 | 0.959   | 0.985        | 0.18                | 0.122   | 0.310         | 0.04                                     | 0.059   | 0.060             | 0.30                | 0.000    | <b>&lt;0.001*</b> | 0.26                                     | 0.160   | 0.748        | -0.12               | 0.533   | 0.882        |
| <i>Thalamo-parietal Right</i>            | -0.07                                 | 0.624   | 0.862        | 0.42                | 0.010   | 0.077         | 0.17                                     | 0.000   | <b>&lt;0.001*</b> | 0.45                | 0.000    | <b>&lt;0.001*</b> | -0.04                                    | 0.833   | 0.920        | 0.17                | 0.355   | 0.755        |
| <i>Thalamo-parietal Left</i>             | -0.17                                 | 0.932   | 0.983        | 0.37                | 0.018   | 0.104         | 0.14                                     | 0.000   | <b>&lt;0.001*</b> | 0.44                | 0.000    | <b>&lt;0.001*</b> | 0.08                                     | 0.653   | 0.891        | 0.05                | 0.781   | 0.916        |
| <i>Thalamo-occipital Right</i>           | 0.13                                  | 0.180   | 0.396        | 0.52                | 0.003   | 0.066         | 0.16                                     | 0.000   | <b>&lt;0.001*</b> | 0.47                | 0.000    | <b>&lt;0.001*</b> | -0.22                                    | 0.236   | 0.748        | 0.32                | 0.079   | 0.748        |
| <i>Thalamo-occipital Left</i>            | -0.02                                 | 0.460   | 0.712        | 0.38                | 0.017   | 0.104         | 0.17                                     | 0.000   | <b>&lt;0.001*</b> | 0.34                | 0.000    | <b>&lt;0.001*</b> | -0.17                                    | 0.371   | 0.761        | 0.17                | 0.365   | 0.760        |
| <i>Superior Thalamic Radiation Right</i> | -0.08                                 | 0.643   | 0.869        | 0.29                | 0.044   | 0.157         | 0.11                                     | 0.001   | <b>0.001</b>      | 0.40                | 0.000    | <b>&lt;0.001*</b> | 0.15                                     | 0.436   | 0.821        | -0.09               | 0.618   | 0.891        |
| <i>Superior Thalamic Radiation Left</i>  | 0.04                                  | 0.323   | 0.562        | 0.52                | 0.003   | 0.066         | 0.06                                     | 0.021   | <b>0.021</b>      | 0.39                | 0.000    | <b>&lt;0.001*</b> | 0.19                                     | 0.307   | 0.748        | -0.04               | 0.849   | 0.920        |
| <i>Anterior Thalamic Radiation Right</i> | 0.07                                  | 0.263   | 0.486        | 0.41                | 0.012   | 0.077         | 0.41                                     | 0.000   | <b>&lt;0.001*</b> | 0.21                | 0.000    | <b>&lt;0.001*</b> | 0.11                                     | 0.557   | 0.886        | 0.26                | 0.161   | 0.748        |
| <i>Anterior Thalamic Radiation Left</i>  | 0.19                                  | 0.106   | 0.288        | 0.61                | 0.001   | <b>0.044*</b> | 0.34                                     | 0.000   | <b>&lt;0.001*</b> | 0.46                | 0.000    | <b>&lt;0.001*</b> | 0.08                                     | 0.669   | 0.891        | 0.23                | 0.214   | 0.748        |

**Supplementary Table S9: Correlations of GFAP with fractional anisotropy and mean diffusivity for striatal and brainstem tracts.** The R<sup>2</sup> are shown adjusted for age, time since injury and sex. Adjusted p-values (Benjamini & Hochberg Correction) are significant if <0.05. Significant values are shown in bold with \*

| Projection Fibres                         | Trauma Controls ~6months after injury |         |               |                     |         |              | Patients after TBI ~6months after injury |         |                   |                     |           |                   | Patients after TBI >5 years after injury |         |              |                     |         |              |
|-------------------------------------------|---------------------------------------|---------|---------------|---------------------|---------|--------------|------------------------------------------|---------|-------------------|---------------------|-----------|-------------------|------------------------------------------|---------|--------------|---------------------|---------|--------------|
|                                           | FA                                    |         |               | MD                  |         |              | FA                                       |         |                   | MD                  |           |                   | FA                                       |         |              | MD                  |         |              |
|                                           | Adj. R <sup>2</sup>                   | P-value | Adj. P-Value  | Adj. R <sup>2</sup> | P-value | Adj. P-Value | Adj. R <sup>2</sup>                      | P-value | Adj. P-Value      | Adj. R <sup>2</sup> | P-value   | Adj. P-Value      | Adj. R <sup>2</sup>                      | P-value | Adj. P-Value | Adj. R <sup>2</sup> | P-value | Adj. P-Value |
| <b>Striatal Fibres</b>                    |                                       |         |               |                     |         |              |                                          |         |                   |                     |           |                   |                                          |         |              |                     |         |              |
| <i>Striato-fronto-orbital Right</i>       | 0.61                                  | 0.001   | <b>0.044*</b> | 0.42                | 0.010   | 0.077        | 0.21                                     | 0.000   | <b>&lt;0.001*</b> | 0.27                | 0.000     | <b>&lt;0.001*</b> | 0.14                                     | 0.457   | 0.837        | 0.05                | 0.457   | 0.837        |
| <i>Striato-fronto-orbital Left</i>        | 0.61                                  | 0.001   | <b>0.044*</b> | 0.42                | 0.010   | 0.077        | 0.21                                     | 0.000   | <b>&lt;0.001*</b> | 0.34                | 0.000     | <b>&lt;0.001*</b> | 0.20                                     | 0.289   | 0.748        | -0.14               | 0.289   | 0.748        |
| <i>Striato-prefrontal Right</i>           | -0.08                                 | 0.638   | 0.869         | 0.21                | 0.209   | 0.429        | 0.37                                     | 0.000   | <b>&lt;0.001*</b> | 0.26                | 0.000     | <b>&lt;0.001*</b> | 0.21                                     | 0.267   | 0.748        | 0.16                | 0.267   | 0.748        |
| <i>Striato-prefrontal Left</i>            | 0.02                                  | 0.365   | 0.621         | 0.46                | 0.007   | 0.077        | 0.31                                     | 0.000   | <b>&lt;0.001*</b> | 0.43                | 0.000     | <b>&lt;0.001*</b> | 0.20                                     | 0.272   | 0.748        | 0.08                | 0.272   | 0.748        |
| <i>Striato-premotor Right</i>             | -0.13                                 | 0.808   | 0.945         | 0.30                | 0.038   | 0.143        | 0.27                                     | 0.000   | <b>&lt;0.001*</b> | 0.42                | 0.000     | <b>&lt;0.001*</b> | 0.25                                     | 0.181   | 0.748        | 0.01                | 0.181   | 0.748        |
| <i>Striato-premotor Left</i>              | -0.07                                 | 0.616   | 0.855         | 0.51                | 0.003   | 0.066        | 0.22                                     | 0.000   | <b>&lt;0.001*</b> | 0.38                | 0.000     | <b>&lt;0.001*</b> | 0.02                                     | 0.897   | 0.939        | 0.22                | 0.897   | 0.939        |
| <i>Striato-precentral Right</i>           | -0.14                                 | 0.862   | 0.955         | 0.04                | 0.317   | 0.555        | 0.22                                     | 0.000   | <b>&lt;0.001*</b> | 0.41                | 0.000     | <b>&lt;0.001*</b> | 0.20                                     | 0.280   | 0.748        | -0.04               | 0.280   | 0.748        |
| <i>Striato-precentral Left</i>            | -0.11                                 | 0.743   | 0.927         | 0.36                | 0.021   | 0.104        | 0.14                                     | 0.000   | <b>&lt;0.001*</b> | 0.35                | 0.000     | <b>&lt;0.001*</b> | 0.24                                     | 0.193   | 0.748        | -0.02               | 0.193   | 0.748        |
| <i>Striato-postcentral Right</i>          | -0.19                                 | 0.982   | 0.985         | -0.08               | 0.644   | 0.869        | 0.08                                     | 0.006   | <b>0.007*</b>     | 0.37                | 0.000     | <b>&lt;0.001*</b> | 0.24                                     | 0.194   | 0.748        | -0.17               | 0.194   | 0.748        |
| <i>Striato-postcentral Left</i>           | -0.16                                 | 0.914   | 0.983         | 0.09                | 0.229   | 0.444        | 0.06                                     | 0.019   | <b>0.019*</b>     | 0.29                | 0.000     | <b>&lt;0.001*</b> | 0.18                                     | 0.344   | 0.755        | -0.07               | 0.344   | 0.755        |
| <i>Striato-parietal Right</i>             | -0.13                                 | 0.812   | 0.945         | 0.32                | 0.033   | 0.129        | 0.21                                     | 0.000   | <b>&lt;0.001*</b> | 0.46                | 0.000     | <b>&lt;0.001*</b> | 0.03                                     | 0.860   | 0.922        | 0.17                | 0.860   | 0.922        |
| <i>Striato-parietal Left</i>              | -0.13                                 | 0.828   | 0.945         | 0.30                | 0.040   | 0.145        | 0.17                                     | 0.000   | <b>&lt;0.001*</b> | 0.37                | 0.000     | <b>&lt;0.001*</b> | 0.04                                     | 0.819   | 0.916        | 0.02                | 0.819   | 0.916        |
| <i>Striato-occipital Right</i>            | 0.10                                  | 0.209   | 0.429         | 0.44                | 0.008   | 0.077        | 0.22                                     | 0.000   | <b>&lt;0.001*</b> | 0.49                | < 2.2e-16 | <b>&lt;0.001*</b> | -0.25                                    | 0.167   | 0.748        | 0.27                | 0.167   | 0.748        |
| <i>Striato-occipital Left</i>             | 0.03                                  | 0.355   | 0.610         | 0.35                | 0.022   | 0.104        | 0.21                                     | 0.000   | <b>&lt;0.001*</b> | 0.32                | 0.000     | <b>&lt;0.001*</b> | -0.19                                    | 0.305   | 0.748        | 0.15                | 0.305   | 0.748        |
| <b>Brainstem</b>                          |                                       |         |               |                     |         |              |                                          |         |                   |                     |           | <b>&lt;0.001*</b> |                                          |         |              |                     |         |              |
| <i>Parieto Occipital pontine Right</i>    | 0.33                                  | 0.031   | 0.127         | 0.11                | 0.199   | 0.426        | 0.01                                     | 0.237   | 0.239             | 0.40                | 0.000     | <b>&lt;0.001*</b> | -0.04                                    | 0.820   | 0.916        | 0.13                | 0.820   | 0.916        |
| <i>Parieto Occipital pontine Left</i>     | -0.12                                 | 0.788   | 0.945         | 0.08                | 0.242   | 0.461        | 0.07                                     | 0.011   | <b>0.011*</b>     | 0.35                | 0.000     | <b>&lt;0.001*</b> | 0.13                                     | 0.476   | 0.851        | -0.06               | 0.476   | 0.851        |
| <i>Fronto-pontine tract Right</i>         | -0.08                                 | 0.648   | 0.869         | 0.06                | 0.296   | 0.528        | 0.25                                     | 0.000   | <b>&lt;0.001*</b> | 0.39                | 0.000     | <b>&lt;0.001*</b> | 0.28                                     | 0.128   | 0.748        | -0.04               | 0.128   | 0.748        |
| <i>Fronto-pontine tract Left</i>          | -0.03                                 | 0.496   | 0.743         | 0.10                | 0.216   | 0.429        | 0.23                                     | 0.000   | <b>&lt;0.001*</b> | 0.35                | 0.000     | <b>&lt;0.001*</b> | 0.19                                     | 0.305   | 0.748        | -0.04               | 0.305   | 0.748        |
| <i>Superior cerebellar peduncle Right</i> | 0.21                                  | 0.090   | 0.263         | -0.15               | 0.870   | 0.956        | 0.03                                     | 0.082   | 0.084             | 0.19                | 0.000     | <b>&lt;0.001*</b> | 0.38                                     | 0.033   | 0.748        | -0.18               | 0.033   | 0.748        |
| <i>Superior cerebellar peduncle Left</i>  | 0.06                                  | 0.294   | 0.528         | -0.14               | 0.843   | 0.945        | 0.02                                     | 0.173   | 0.175             | 0.11                | 0.001     | <b>0.001*</b>     | 0.23                                     | 0.220   | 0.748        | -0.15               | 0.220   | 0.748        |
| <i>Inferior cerebellar peduncle Right</i> | 0.26                                  | 0.058   | 0.193         | 0.00                | 0.421   | 0.693        | 0.15                                     | 0.000   | <b>&lt;0.001*</b> | 0.10                | 0.002     | <b>0.002*</b>     | 0.33                                     | 0.066   | 0.748        | -0.28               | 0.066   | 0.748        |
| <i>Inferior cerebellar peduncle Left</i>  | 0.38                                  | 0.017   | 0.104         | 0.16                | 0.133   | 0.330        | 0.06                                     | 0.019   | <b>0.019*</b>     | 0.05                | 0.044     | <b>0.045*</b>     | 0.38                                     | 0.038   | 0.748        | -0.12               | 0.038   | 0.748        |
| <i>Middle cerebellar peduncle</i>         | 0.18                                  | 0.116   | 0.301         | -0.10               | 0.7027  | 0.89252891   | 0.01                                     | 0.237   | 0.239             | 0.14                | 0.000     | <b>&lt;0.001*</b> | 0.31                                     | 0.093   | 0.748        | -0.35               | 0.093   | 0.748        |

**Supplementary Table S10: Correlations of GFAP with fractional anisotropy and mean diffusivity for Association fibres.** The R<sup>2</sup> are shown adjusted for age, time since injury and sex. Adjusted p-values (Benjamini & Hochberg Correction) are significant if <0.05. Significant values are shown in bold with \*

| Projection Fibres                               | Trauma Controls ~6months after injury |         |              |                     |         |              | Patients after TBI ~6months after injury |              |                     |         |         |                   | Patients after TBI >5 years after injury |                     |         |              |         |              |                     |
|-------------------------------------------------|---------------------------------------|---------|--------------|---------------------|---------|--------------|------------------------------------------|--------------|---------------------|---------|---------|-------------------|------------------------------------------|---------------------|---------|--------------|---------|--------------|---------------------|
|                                                 | FA                                    |         | MD           |                     | P-value | Adj. P-Value | FA                                       |              | MD                  |         | P-value | Adj. P-Value      | FA                                       |                     | MD      |              | P-value | Adj. P-Value |                     |
|                                                 | Adj. R <sup>2</sup>                   | P-value | Adj. P-Value | Adj. R <sup>2</sup> |         |              | P-value                                  | Adj. P-Value | Adj. R <sup>2</sup> | P-value |         |                   | Adj. P-Value                             | Adj. R <sup>2</sup> | P-value | Adj. P-Value |         |              | Adj. R <sup>2</sup> |
| <b>Association Fibres</b>                       |                                       |         |              |                     |         |              |                                          |              |                     |         |         |                   |                                          |                     |         |              |         |              |                     |
| <i>Superior longitudinal fascicle I Right</i>   | -0.16                                 | 0.922   | 0.983        | 0.13                | 0.169   | 0.389        | 0.34                                     | <0.001       | <b>&lt;0.001*</b>   | 0.40    | <0.001  | <b>&lt;0.001*</b> | -0.12                                    | 0.529               | 0.882   | 0.08         | 0.675   | 0.891        |                     |
| <i>Superior longitudinal fascicle I Left</i>    | -0.18                                 | 0.963   | 0.985        | 0.08                | 0.077   | 0.236        | 0.24                                     | <0.001       | <b>&lt;0.001*</b>   | 0.32    | <0.001  | <b>&lt;0.001*</b> | 0.06                                     | 0.737               | 0.916   | -0.10        | 0.591   | 0.886        |                     |
| <i>Superior longitudinal fascicle II Right</i>  | -0.12                                 | 0.795   | 0.945        | 0.18                | 0.120   | 0.310        | 0.38                                     | <0.001       | <b>&lt;0.001*</b>   | 0.44    | <0.001  | <b>&lt;0.001*</b> | -0.08                                    | 0.666               | 0.891   | 0.18         | 0.331   | 0.755        |                     |
| <i>Superior longitudinal fascicle II Left</i>   | -0.12                                 | 0.796   | 0.945        | 0.14                | 0.163   | 0.388        | 0.31                                     | <0.001       | <b>&lt;0.001*</b>   | 0.39    | <0.001  | <b>&lt;0.001*</b> | 0.02                                     | 0.896               | 0.939   | -0.01        | 0.967   | 0.974        |                     |
| <i>Superior longitudinal fascicle III Right</i> | 0.10                                  | 0.215   | 0.429        | 0.42                | 0.010   | 0.077        | 0.49                                     | <0.001       | <b>&lt;0.001*</b>   | 0.54    | <0.001  | <b>&lt;0.001*</b> | 0.09                                     | 0.629               | 0.891   | 0.12         | 0.521   | 0.882        |                     |
| <i>Superior longitudinal fascicle III Left</i>  | -0.08                                 | 0.660   | 0.876        | 0.32                | 0.031   | 0.127        | 0.40                                     | 0.001        | <b>0.001*</b>       | 0.44    | 0.001   | <b>0.001*</b>     | -0.05                                    | 0.794               | 0.916   | 0.11         | 0.560   | 0.886        |                     |
| <i>Inferior longitudinal fascicle Right</i>     | 0.21                                  | 0.092   | 0.263        | 0.24                | 0.071   | 0.224        | 0.25                                     | <0.001       | <b>&lt;0.001*</b>   | 0.40    | <0.001  | <b>&lt;0.001*</b> | -0.08                                    | 0.681               | 0.891   | 0.08         | 0.683   | 0.891        |                     |
| <i>Inferior longitudinal fascicle Left</i>      | 0.10                                  | 0.211   | 0.429        | 0.42                | 0.010   | 0.077        | 0.27                                     | <0.001       | <b>&lt;0.001*</b>   | 0.25    | <0.001  | <b>&lt;0.001*</b> | 0.11                                     | 0.565               | 0.886   | 0.05         | 0.807   | 0.916        |                     |
| <i>Uncinate fascicle Right</i>                  | -0.14                                 | 0.836   | 0.945        | -0.09               | 0.699   | 0.893        | 0.24                                     | <0.001       | <b>&lt;0.001*</b>   | 0.28    | <0.001  | <b>&lt;0.001*</b> | 0.05                                     | 0.796               | 0.916   | 0.21         | 0.246   | 0.748        |                     |
| <i>Uncinate fascicle Left</i>                   | -0.02                                 | 0.473   | 0.720        | -0.09               | 0.685   | 0.891        | 0.22                                     | <0.001       | <b>&lt;0.001*</b>   | 0.27    | <0.001  | <b>&lt;0.001*</b> | 0.20                                     | 0.282               | 0.748   | 0.01         | 0.949   | 0.974        |                     |
| <i>Arcuate fascicle Right</i>                   | 0.09                                  | 0.238   | 0.455        | 0.11                | 0.204   | 0.429        | 0.39                                     | <0.001       | <b>&lt;0.001*</b>   | 0.49    | <0.001  | <b>&lt;0.001*</b> | 0.17                                     | 0.372               | 0.761   | 0.12         | 0.532   | 0.882        |                     |
| <i>Arcuate fascicle Left</i>                    | -0.02                                 | 0.468   | 0.717        | 0.24                | 0.067   | 0.216        | 0.31                                     | <0.001       | <b>&lt;0.001*</b>   | 0.37    | <0.001  | <b>0.001*</b>     | 0.17                                     | 0.351               | 0.755   | -0.08        | 0.674   | 0.891        |                     |
| <i>Cingulum Right</i>                           | 0.00                                  | 0.431   | 0.694        | -0.10               | 0.734   | 0.923        | 0.23                                     | <0.001       | <b>&lt;0.001*</b>   | 0.39    | <0.001  | <b>&lt;0.001*</b> | -0.08                                    | 0.686               | 0.891   | 0.07         | 0.697   | 0.898        |                     |
| <i>Cingulum Left</i>                            | -0.01                                 | 0.433   | 0.694        | -0.09               | 0.688   | 0.891        | 0.30                                     | <0.001       | <b>&lt;0.001*</b>   | 0.34    | <0.001  | <b>&lt;0.001*</b> | -0.04                                    | 0.851               | 0.920   | -0.07        | 0.711   | 0.899        |                     |
| <i>Middle longitudinal fascicle Right</i>       | 0.00                                  | 0.416   | 0.693        | 0.16                | 0.138   | 0.340        | 0.28                                     | <0.001       | <b>&lt;0.001*</b>   | 0.46    | <0.001  | <b>&lt;0.001*</b> | 0.08                                     | 0.677               | 0.891   | 0.16         | 0.403   | 0.806        |                     |
| <i>Middle longitudinal fascicle Left</i>        | -0.07                                 | 0.608   | 0.854        | 0.26                | 0.058   | 0.193        | 0.27                                     | <0.001       | <b>&lt;0.001*</b>   | 0.27    | <0.001  | <b>&lt;0.001*</b> | 0.31                                     | 0.088               | 0.748   | 0.04         | 0.819   | 0.916        |                     |
| <i>Inferior occipito-frontal fascicle Right</i> | 0.13                                  | 0.175   | 0.390        | 0.52                | 0.003   | 0.066        | 0.28                                     | <0.001       | <b>&lt;0.001*</b>   | 0.53    | <0.001  | <b>&lt;0.001*</b> | -0.19                                    | 0.304               | 0.748   | 0.33         | 0.072   | 0.748        |                     |
| <i>Inferior occipito-frontal fascicle Left</i>  | 0.10                                  | 0.213   | 0.429        | 0.48                | 0.005   | 0.076        | 0.28                                     | <0.001       | <b>&lt;0.001*</b>   | 0.49    | <0.001  | <b>0.001*</b>     | 0.01                                     | 0.970               | 0.974   | 0.23         | 0.208   | 0.748        |                     |
| <i>Optic Radiation Right</i>                    | 0.08                                  | 0.250   | 0.468        | 0.51                | 0.003   | 0.069        | 0.18                                     | <0.001       | <b>&lt;0.001*</b>   | 0.47    | <0.001  | <b>&lt;0.001*</b> | -0.21                                    | 0.267               | 0.748   | 0.34         | 0.063   | 0.748        |                     |
| <i>Optic Radiation Left</i>                     | -0.05                                 | 0.553   | 0.800        | 0.37                | 0.018   | 0.104        | 0.17                                     | <0.001       | <b>&lt;0.001*</b>   | 0.32    | <0.001  | <b>&lt;0.001*</b> | -0.14                                    | 0.437               | 0.821   | 0.17         | 0.365   | 0.760        |                     |



**Supplementary Table S11: Correlations of NFL with fractional anisotropy and mean diffusivity for projection fibres, commissural fibres and thalamic radiations.** The R<sup>2</sup> are shown adjusted for age, time since injury and sex. Adjusted p-values (Benjamini & Hochberg Correction) are significant if <0.05. Significant values are shown in bold with \*

| NFL<br>Projection Fibres                 | Trauma Controls ~6months after injury |         |              |                     |           |               | Patients after TBI ~6months after injury |         |                   |                     |         |                   | Patients after TBI >5 years after injury |         |              |                     |         |              |
|------------------------------------------|---------------------------------------|---------|--------------|---------------------|-----------|---------------|------------------------------------------|---------|-------------------|---------------------|---------|-------------------|------------------------------------------|---------|--------------|---------------------|---------|--------------|
|                                          | FA                                    |         |              | MD                  |           |               | FA                                       |         |                   | MD                  |         |                   | FA                                       |         |              | MD                  |         |              |
|                                          | Adj. R <sup>2</sup>                   | P-value | Adj. P-Value | Adj. R <sup>2</sup> | P-value   | Adj. P-Value  | Adj. R <sup>2</sup>                      | P-value | Adj. P-Value      | Adj. R <sup>2</sup> | P-value | Adj. P-Value      | Adj. R <sup>2</sup>                      | P-value | Adj. P-Value | Adj. R <sup>2</sup> | P-value | Adj. P-Value |
| <i>Corticospinal tract Right</i>         | -0.16                                 | 0.923   | 0.983        | -0.14               | 0.838     | 0.945         | 0.21                                     | <0.001  | <b>&lt;0.001*</b> | 0.38                | <0.001  | <b>&lt;0.001*</b> | 0.18                                     | 0.054   | 0.748        | -0.06               | 0.763   | 0.916        |
| <i>Corticospinal tract Left</i>          | -0.13                                 | 0.832   | 0.945        | -0.04               | 0.537     | 0.782         | 0.14                                     | <0.001  | <b>&lt;0.001*</b> | 0.28                | <0.001  | <b>&lt;0.001*</b> | 0.24                                     | 0.024   | 0.748        | -0.12               | 0.513   | 0.876        |
| <b>Commissural Fibres</b>                |                                       |         |              |                     |           |               |                                          | <0.001  | <b>0.001*</b>     |                     | <0.001  | <b>0.001*</b>     |                                          |         |              |                     |         |              |
| <i>CC Genu</i>                           | -0.05                                 | 0.568   | 0.814        | 0.22                | 0.086     | 0.260         | 0.27                                     | <0.001  | <b>&lt;0.001*</b> | 0.43                | <0.001  | <b>&lt;0.001*</b> | 0.08                                     | 0.189   | 0.748        | 0.22                | 0.234   | 0.748        |
| <i>CC Body</i>                           | -0.17                                 | 0.929   | 0.983        | 0.35                | 0.023     | 0.104         | 0.33                                     | <0.001  | <b>&lt;0.001*</b> | 0.51                | <0.001  | <b>&lt;0.001*</b> | 0.11                                     | 0.142   | 0.748        | 0.22                | 0.235   | 0.748        |
| <i>Splenium</i>                          | -0.02                                 | 0.466   | 0.717        | 0.31                | 0.035     | 0.136         | 0.22                                     | 0.001   | <b>&lt;0.001*</b> | 0.40                | 0.001   | <b>&lt;0.001*</b> | 0.13                                     | 0.107   | 0.748        | 0.13                | 0.478   | 0.851        |
| <i>Commissure Anterior</i>               | 0.22                                  | 0.082   | 0.250        | 0.17                | 0.128     | 0.322         | 0.22                                     | <0.001  | <b>&lt;0.001*</b> | 0.27                | <0.001  | <b>&lt;0.001*</b> | 0.08                                     | 0.189   | 0.748        | -0.14               | 0.459   | 0.837        |
| <i>Fornix Right</i>                      | 0.10                                  | 0.214   | 0.429        | 0.18                | 0.115     | 0.301         | 0.30                                     | <0.001  | <b>&lt;0.001*</b> | 0.18                | <0.001  | <b>&lt;0.001*</b> | 0.25                                     | 0.020   | 0.748        | -0.29               | 0.108   | 0.748        |
| <i>Fornix Left</i>                       | 0.42                                  | 0.010   | 0.077        | 0.44                | 0.009     | 0.077         | 0.35                                     | <0.001  | <b>&lt;0.001*</b> | 0.35                | <0.001  | <b>&lt;0.001*</b> | 0.23                                     | 0.029   | 0.748        | -0.09               | 0.622   | 0.891        |
| <b>Thalamic Radiations</b>               |                                       |         |              |                     |           |               |                                          | <0.001  | <b>&lt;0.001*</b> |                     | <0.001  | <b>&lt;0.001*</b> |                                          |         |              |                     |         |              |
| <i>Thalamo-prefrontal Right</i>          | -0.03                                 | 0.496   | 0.743        | 0.33                | 0.031     | 0.127         | 0.45                                     | <0.001  | <b>&lt;0.001*</b> | 0.34                | <0.001  | <b>&lt;0.001*</b> | 0.05                                     | 0.770   | 0.916        | 0.24                | 0.185   | 0.748        |
| <i>Thalamo-prefrontal Left</i>           | -0.01                                 | 0.447   | 0.709        | 0.49                | 0.004     | 0.071         | 0.37                                     | <0.001  | <b>&lt;0.001*</b> | 0.46                | <0.001  | <b>&lt;0.001*</b> | 0.05                                     | 0.777   | 0.916        | 0.22                | 0.229   | 0.748        |
| <i>Thalamo-premotor Right</i>            | -0.14                                 | 0.858   | 0.954        | 0.41                | 0.011     | 0.077         | 0.30                                     | <0.001  | <b>&lt;0.001*</b> | 0.46                | <0.001  | <b>&lt;0.001*</b> | 0.07                                     | 0.705   | 0.898        | 0.28                | 0.124   | 0.748        |
| <i>Thalamo-premotor Left</i>             | -0.12                                 | 0.770   | 0.938        | 0.55                | 0.002     | 0.066         | 0.25                                     | <0.001  | <b>0.001*</b>     | 0.41                | <0.001  | <b>0.001*</b>     | 0.00                                     | 0.983   | 0.983        | 0.20                | 0.276   | 0.748        |
| <i>Thalamo-precentral Right</i>          | -0.18                                 | 0.955   | 0.985        | 0.16                | 0.142     | 0.345         | 0.31                                     | <0.001  | <b>&lt;0.001*</b> | 0.47                | <0.001  | <b>&lt;0.001*</b> | 0.10                                     | 0.582   | 0.886        | 0.14                | 0.441   | 0.821        |
| <i>Thalamo-precentral Left</i>           | -0.18                                 | 0.955   | 0.985        | 0.41                | 0.012     | 0.077         | 0.17                                     | <0.001  | <b>&lt;0.001*</b> | 0.35                | <0.001  | <b>&lt;0.001*</b> | 0.15                                     | 0.411   | 0.810        | 0.10                | 0.606   | 0.891        |
| <i>Thalamo-postcentral Right</i>         | -0.08                                 | 0.657   | 0.876        | -0.11               | 0.753     | 0.929         | 0.10                                     | 0.002   | <b>0.002*</b>     | 0.42                | <0.001  | <b>&lt;0.001*</b> | 0.15                                     | 0.425   | 0.821        | -0.06               | 0.766   | 0.916        |
| <i>Thalamo-postcentral Left</i>          | -0.13                                 | 0.830   | 0.945        | 0.19                | 0.104     | 0.287         | 0.13                                     | <0.001  | <b>0.001*</b>     | 0.32                | <0.001  | <b>&lt;0.001*</b> | 0.14                                     | 0.439   | 0.821        | 0.07                | 0.704   | 0.898        |
| <i>Thalamo-parietal Right</i>            | -0.16                                 | 0.919   | 0.983        | 0.43                | 0.009     | 0.077         | 0.31                                     | <0.001  | <b>&lt;0.001*</b> | 0.50                | <0.001  | <b>&lt;0.001*</b> | 0.04                                     | 0.820   | 0.916        | 0.09                | 0.648   | 0.891        |
| <i>Thalamo-parietal Left</i>             | -0.18                                 | 0.971   | 0.985        | 0.36                | 0.020     | 0.104         | 0.23                                     | <0.001  | <b>&lt;0.001*</b> | 0.44                | <0.001  | <b>&lt;0.001*</b> | 0.13                                     | 0.490   | 0.851        | 0.17                | 0.355   | 0.755        |
| <i>Thalamo-occipital Right</i>           | 0.05                                  | 0.045   | 0.159        | 0.50                | 0.004     | 0.070         | 0.30                                     | <0.001  | <b>0.001*</b>     | 0.52                | <0.001  | <b>&lt;0.001*</b> | 0.06                                     | 0.764   | 0.916        | 0.22                | 0.242   | 0.748        |
| <i>Thalamo-occipital Left</i>            | -0.03                                 | 0.496   | 0.743        | 0.34                | 0.026     | 0.120         | 0.19                                     | <0.001  | <b>&lt;0.001*</b> | 0.30                | <0.001  | <b>&lt;0.001*</b> | -0.01                                    | 0.969   | 0.974        | 0.26                | 0.150   | 0.748        |
| <i>Superior Thalamic Radiation Right</i> | -0.11                                 | 0.761   | 0.935        | 0.30                | 0.038     | 0.143         | 0.21                                     | 0.001   | <b>&lt;0.001*</b> | 0.44                | <0.001  | <b>&lt;0.001*</b> | 0.08                                     | 0.669   | 0.891        | 0.04                | 0.819   | 0.916        |
| <i>Superior Thalamic Radiation Left</i>  | -0.01                                 | 0.453   | 0.710        | 0.52                | 0.003     | 0.066         | 0.11                                     | 0.001   | <b>0.002*</b>     | 0.38                | <0.001  | <b>&lt;0.001*</b> | 0.10                                     | 0.595   | 0.886        | 0.04                | 0.850   | 0.920        |
| <i>Anterior Thalamic Radiation Right</i> | 0.05                                  | 0.299   | 0.530        | 0.41                | 0.011     | 0.077         | 0.49                                     | <0.001  | <b>&lt;0.001*</b> | 0.21                | <0.001  | <b>0.001*</b>     | -0.08                                    | 0.665   | 0.891        | 0.26                | 0.158   | 0.748        |
| <i>Anterior Thalamic Radiation Left</i>  | 0.11                                  | 0.208   | 0.429        | 0.61                | 0.0006529 | <b>0.044*</b> | 0.42                                     | <0.001  | <b>&lt;0.001*</b> | 0.50                | 0.001   | <b>&lt;0.001*</b> | -0.02                                    | 0.933   | 0.965        | 0.24                | 0.197   | 0.748        |

**Supplementary Table S12: Correlations of NFL with fractional anisotropy and mean diffusivity for striatal and brainstem tracts.** The R<sup>2</sup> are shown adjusted for age, time since injury and sex. Adjusted p-values (Benjamini & Hochberg Correction) are significant if <0.05. Significant values are shown in bold with \*

| Projection Fibres                         | Trauma Controls ~6months after injury |         |              |                     |         |              | Patients after TBI ~6months after injury |         |                   |                     |         |                   | Patients after TBI >5 years after injury |         |              |                     |         |              |
|-------------------------------------------|---------------------------------------|---------|--------------|---------------------|---------|--------------|------------------------------------------|---------|-------------------|---------------------|---------|-------------------|------------------------------------------|---------|--------------|---------------------|---------|--------------|
|                                           | FA                                    |         | MD           |                     |         |              | FA                                       |         | MD                |                     |         |                   | FA                                       |         | MD           |                     |         |              |
|                                           | Adj. R <sup>2</sup>                   | P-value | Adj. P-Value | Adj. R <sup>2</sup> | P-value | Adj. P-Value | Adj. R <sup>2</sup>                      | P-value | Adj. P-Value      | Adj. R <sup>2</sup> | P-value | Adj. P-Value      | Adj. R <sup>2</sup>                      | P-value | Adj. P-Value | Adj. R <sup>2</sup> | P-value | Adj. P-Value |
| <b>Striatal Fibres</b>                    |                                       |         |              |                     |         |              |                                          |         |                   |                     |         |                   |                                          |         |              |                     |         |              |
| <i>Striato-fronto-orbital Right</i>       | 0.35                                  | 0.022   | 0.104        | -0.04               | 0.529   | 0.774        | 0.32                                     | <0.001  | <b>&lt;0.001*</b> | 0.42                | <0.001  | <b>&lt;0.001*</b> | 0.13                                     | 0.491   | 0.851        | 0.17                | 0.376   | 0.763        |
| <i>Striato-fronto-orbital Left</i>        | 0.35                                  | 0.022   | 0.104        | 0.28                | 0.050   | 0.171        | 0.32                                     | <0.001  | <b>&lt;0.001*</b> | 0.42                | <0.001  | <b>&lt;0.001*</b> | 0.08                                     | 0.688   | 0.891        | -0.03               | 0.885   | 0.939        |
| <i>Striato-prefrontal Right</i>           | 0.08                                  | 0.648   | 0.869        | 0.21                | 0.092   | 0.263        | 0.44                                     | <0.001  | <b>0.001*</b>     | 0.27                | <0.001  | <b>0.001*</b>     | 0.10                                     | 0.611   | 0.891        | 0.18                | 0.342   | 0.755        |
| <i>Striato-prefrontal Left</i>            | -0.07                                 | 0.612   | 0.854        | 0.43                | 0.009   | 0.077        | 0.39                                     | <0.001  | <b>&lt;0.001*</b> | 0.46                | <0.001  | <b>&lt;0.001*</b> | 0.10                                     | 0.588   | 0.886        | 0.20                | 0.287   | 0.748        |
| <i>Striato-premotor Right</i>             | -0.12                                 | 0.793   | 0.945        | 0.31                | 0.036   | 0.136        | 0.30                                     | <0.001  | <b>&lt;0.001*</b> | 0.43                | <0.001  | <b>&lt;0.001*</b> | 0.01                                     | 0.963   | 0.974        | 0.20                | 0.299   | 0.748        |
| <i>Striato-premotor Left</i>              | -0.17                                 | 0.939   | 0.985        | 0.45                | 0.007   | 0.077        | 0.25                                     | 0.001   | <b>&lt;0.001*</b> | 0.39                | 0.001   | <b>&lt;0.001*</b> | 0.08                                     | 0.675   | 0.891        | 0.19                | 0.300   | 0.748        |
| <i>Striato-precentral Right</i>           | -0.17                                 | 0.928   | 0.983        | 0.06                | 0.292   | 0.528        | 0.30                                     | <0.001  | <b>&lt;0.001*</b> | 0.44                | <0.001  | <b>&lt;0.001*</b> | -0.10                                    | 0.594   | 0.886        | 0.16                | 0.393   | 0.792        |
| <i>Striato-precentral Left</i>            | -0.19                                 | 0.981   | 0.985        | 0.35                | 0.023   | 0.104        | 0.19                                     | <0.001  | <b>&lt;0.001*</b> | 0.34                | <0.001  | <b>&lt;0.001*</b> | 0.18                                     | 0.320   | 0.755        | 0.11                | 0.567   | 0.886        |
| <i>Striato-postcentral Right</i>          | -0.18                                 | 0.967   | 0.985        | -0.08               | 0.643   | 0.869        | 0.21                                     | <0.001  | <b>&lt;0.001*</b> | 0.44                | <0.001  | <b>&lt;0.001*</b> | 0.03                                     | 0.888   | 0.939        | 0.04                | 0.675   | 0.891        |
| <i>Striato-postcentral Left</i>           | -0.16                                 | 0.904   | 0.983        | 0.11                | 0.207   | 0.429        | 0.15                                     | <0.001  | <b>&lt;0.001*</b> | 0.31                | <0.001  | <b>&lt;0.001*</b> | 0.14                                     | 0.439   | 0.821        | 0.08                | 0.675   | 0.891        |
| <i>Striato-parietal Right</i>             | -0.18                                 | 0.974   | 0.985        | 0.33                | 0.029   | 0.125        | 0.36                                     | <0.001  | <b>&lt;0.001*</b> | 0.50                | <0.001  | <b>&lt;0.001*</b> | 0.04                                     | 0.841   | 0.920        | 0.09                | 0.642   | 0.891        |
| <i>Striato-parietal Left</i>              | -0.17                                 | 0.941   | 0.985        | 0.30                | 0.040   | 0.145        | 0.26                                     | <0.001  | <b>&lt;0.001*</b> | 0.36                | <0.001  | <b>&lt;0.001*</b> | 0.09                                     | 0.625   | 0.891        | 0.19                | 0.299   | 0.748        |
| <i>Striato-occipital Right</i>            | 0.06                                  | 0.294   | 0.528        | 0.43                | 0.010   | 0.077        | 0.37                                     | <0.001  | <b>&lt;0.001*</b> | 0.52                | <0.001  | <b>&lt;0.001*</b> | -0.05                                    | 0.775   | 0.916        | 0.18                | 0.333   | 0.755        |
| <i>Striato-occipital Left</i>             | 0.01                                  | 0.395   | 0.666        | 0.33                | 0.031   | 0.127        | 0.22                                     | <0.001  | <b>0.001*</b>     | 0.27                | <0.001  | <b>0.001*</b>     | -0.06                                    | 0.746   | 0.916        | 0.26                | 0.157   | 0.748        |
| <b>Brainstem</b>                          |                                       |         |              |                     |         |              |                                          |         |                   |                     |         |                   |                                          |         |              |                     |         |              |
| <i>Parieto Occipital pontine Right</i>    | -0.20                                 | 0.997   | 0.997        | 0.12                | 0.186   | 0.401        | 0.29                                     | <0.001  | <b>&lt;0.001*</b> | 0.46                | <0.001  | <b>&lt;0.001*</b> | 0.12                                     | 0.537   | 0.883        | 0.07                | 0.720   | 0.906        |
| <i>Parieto Occipital pontine Left</i>     | 0.18                                  | 0.960   | 0.985        | 0.08                | 0.255   | 0.474        | 0.17                                     | <0.001  | <b>0.002*</b>     | 0.36                | <0.001  | <b>0.002*</b>     | 0.11                                     | 0.572   | 0.886        | 0.13                | 0.482   | 0.851        |
| <i>Fronto-pontine tract Right</i>         | -0.13                                 | 0.807   | 0.945        | 0.05                | 0.305   | 0.538        | 0.33                                     | <0.001  | <b>0.001*</b>     | 0.42                | <0.001  | <b>0.001*</b>     | 0.22                                     | 0.233   | 0.748        | 0.13                | 0.487   | 0.851        |
| <i>Fronto-pontine tract Left</i>          | -0.13                                 | 0.808   | 0.945        | 0.09                | 0.228   | 0.444        | 0.30                                     | <0.001  | <b>&lt;0.001*</b> | 0.37                | <0.001  | <b>&lt;0.001*</b> | 0.20                                     | 0.288   | 0.748        | 0.11                | 0.566   | 0.886        |
| <i>Superior cerebellar peduncle Right</i> | 0.26                                  | 0.058   | 0.193        | 0.17                | 0.130   | 0.326        | 0.08                                     | 0.008   | <b>0.009*</b>     | 0.20                | <0.001  | <b>&lt;0.001*</b> | 0.36                                     | 0.047   | 0.748        | -0.20               | 0.286   | 0.748        |
| <i>Superior cerebellar peduncle Left</i>  | 0.15                                  | 0.154   | 0.371        | -0.13               | 0.834   | 0.945        | 0.08                                     | 0.007   | <b>0.007*</b>     | 0.17                | <0.001  | <b>0.001*</b>     | 0.18                                     | 0.328   | 0.755        | -0.21               | 0.258   | 0.748        |
| <i>Inferior cerebellar peduncle Right</i> | 0.21                                  | 0.090   | 0.263        | 0.32                | 0.032   | 0.129        | 0.17                                     | <0.001  | <b>0.001*</b>     | 0.11                | 0.001   | <b>&lt;0.001*</b> | 0.30                                     | 0.100   | 0.748        | -0.21               | 0.254   | 0.748        |
| <i>Inferior cerebellar peduncle Left</i>  | 0.24                                  | 0.071   | 0.224        | 0.28                | 0.048   | 0.168        | 0.11                                     | 0.001   | <b>0.002*</b>     | 0.13                | <0.001  | <b>&lt;0.001*</b> | 0.30                                     | 0.106   | 0.748        | -0.20               | 0.292   | 0.748        |
| <i>Middle cerebellar peduncle</i>         | 0.19                                  | 0.108   | 0.290        | -0.07               | 0.610   | 0.854        | 0.06                                     | 0.020   | <b>0.020*</b>     | 0.20                | <0.001  | <b>&lt;0.001*</b> | 0.41                                     | 0.021   | 0.748        | -0.34               | 0.058   | 0.748        |

**Supplementary Table S13: Correlations of GFAP with fractional anisotropy and mean diffusivity for Association fibres. The R<sup>2</sup> are shown adjusted for age, time since injury and sex. Adjusted p-values (Benjamini & Hochberg Correction) are significant if <0.05. Significant values are shown in bold with \***

| Projection Fibres                               | Trauma Controls ~6months after injury |         |              |                     |         |              | Patients after TBI ~6months after injury |         |                   |                     |         |                   | Patients after TBI >5 years after injury |         |              |                     |         |              |
|-------------------------------------------------|---------------------------------------|---------|--------------|---------------------|---------|--------------|------------------------------------------|---------|-------------------|---------------------|---------|-------------------|------------------------------------------|---------|--------------|---------------------|---------|--------------|
|                                                 | FA                                    |         | MD           |                     | P-value |              | FA                                       |         | MD                |                     | P-value |                   | FA                                       |         | MD           |                     | P-value |              |
|                                                 | Adj. R <sup>2</sup>                   | P-value | Adj. P-Value | Adj. R <sup>2</sup> | P-value | Adj. P-Value | Adj. R <sup>2</sup>                      | P-value | Adj. P-Value      | Adj. R <sup>2</sup> | P-value | Adj. P-Value      | Adj. R <sup>2</sup>                      | P-value | Adj. P-Value | Adj. R <sup>2</sup> | P-value | Adj. P-Value |
| <b>Association Fibres</b>                       |                                       |         |              |                     |         |              |                                          |         |                   |                     |         |                   |                                          |         |              |                     |         |              |
| <i>Superior longitudinal fascicle I Right</i>   | -0.12                                 | 0.800   | 0.945        | 0.13                | 0.167   | 0.389        | 0.44                                     | <0.001  | <b>&lt;0.001*</b> | 0.45                | <0.001  | <b>&lt;0.001*</b> | -0.09                                    | 0.639   | 0.891        | 0.04                | 0.817   | 0.916        |
| <i>Superior longitudinal fascicle I Left</i>    | -0.09                                 | 0.695   | 0.893        | 0.06                | 0.278   | 0.510        | 0.33                                     | <0.001  | <b>&lt;0.001*</b> | 0.34                | <0.001  | <b>&lt;0.001*</b> | 0.18                                     | 0.323   | 0.755        | 0.06                | 0.764   | 0.916        |
| <i>Superior longitudinal fascicle II Right</i>  | -0.09                                 | 0.682   | 0.891        | 0.21                | 0.091   | 0.263        | 0.47                                     | <0.001  | <b>0.001*</b>     | 0.48                | <0.001  | <b>0.001*</b>     | -0.15                                    | 0.432   | 0.821        | 0.11                | 0.563   | 0.886        |
| <i>Superior longitudinal fascicle II Left</i>   | 0.14                                  | 0.853   | 0.952        | 0.13                | 0.174   | 0.390        | 0.38                                     | <0.001  | <b>&lt;0.001*</b> | 0.41                | <0.001  | <b>&lt;0.001*</b> | -0.02                                    | 0.907   | 0.942        | 0.19                | 0.305   | 0.748        |
| <i>Superior longitudinal fascicle III Right</i> | 0.12                                  | 0.182   | 0.397        | 0.41                | 0.012   | 0.077        | 0.56                                     | <0.001  | <b>&lt;0.001*</b> | 0.56                | <0.001  | <b>&lt;0.001*</b> | -0.23                                    | 0.227   | 0.748        | 0.30                | 0.106   | 0.748        |
| <i>Superior longitudinal fascicle III Left</i>  | 0.02                                  | 0.366   | 0.621        | 0.36                | 0.020   | 0.104        | 0.47                                     | <0.001  | <b>&lt;0.001*</b> | 0.44                | <0.001  | <b>&lt;0.001*</b> | 0.02                                     | 0.895   | 0.939        | 0.21                | 0.255   | 0.748        |
| <i>Inferior longitudinal fascicle Right</i>     | 0.20                                  | 0.096   | 0.271        | 0.19                | 0.107   | 0.288        | 0.41                                     | 0.001   | <b>&lt;0.001*</b> | 0.44                | 0.001   | <b>&lt;0.001*</b> | 0.15                                     | 0.411   | 0.810        | 0.04                | 0.813   | 0.916        |
| <i>Inferior longitudinal fascicle Left</i>      | 0.13                                  | 0.171   | 0.389        | 0.36                | 0.021   | 0.104        | 0.30                                     | <0.001  | <b>&lt;0.001*</b> | 0.22                | <0.001  | <b>&lt;0.001*</b> | 0.19                                     | 0.295   | 0.748        | 0.15                | 0.434   | 0.821        |
| <i>Uncinate fascicle Right</i>                  | -0.09                                 | 0.700   | 0.893        | -0.14               | 0.866   | 0.955        | 0.37                                     | <0.001  | <b>&lt;0.001*</b> | 0.30                | <0.001  | <b>&lt;0.001*</b> | 0.10                                     | 0.585   | 0.886        | 0.22                | 0.232   | 0.748        |
| <i>Uncinate fascicle Left</i>                   | 0.01                                  | 0.407   | 0.681        | -0.01               | 0.456   | 0.711        | 0.30                                     | <0.001  | <b>&lt;0.001*</b> | 0.30                | <0.001  | <b>&lt;0.001*</b> | 0.25                                     | 0.168   | 0.748        | -0.04               | 0.830   | 0.920        |
| <i>Arcuate fascicle Right</i>                   | 0.09                                  | 0.232   | 0.447        | 0.13                | 0.171   | 0.389        | 0.50                                     | <0.001  | <b>&lt;0.001*</b> | 0.53                | <0.001  | <b>&lt;0.001*</b> | 0.12                                     | 0.525   | 0.882        | 0.18                | 0.341   | 0.755        |
| <i>Arcuate fascicle Left</i>                    | -0.01                                 | 0.444   | 0.709        | 0.24                | 0.073   | 0.227        | 0.38                                     | <0.001  | <b>&lt;0.001*</b> | 0.36                | <0.001  | <b>&lt;0.001*</b> | 0.23                                     | 0.210   | 0.748        | 0.17                | 0.366   | 0.760        |
| <i>Cingulum Right</i>                           | -0.04                                 | 0.523   | 0.769        | -0.10               | 0.722   | 0.912        | 0.34                                     | <0.001  | <b>&lt;0.001*</b> | 0.42                | <0.001  | <b>&lt;0.001*</b> | 0.04                                     | 0.842   | 0.920        | 0.02                | 0.903   | 0.942        |
| <i>Cingulum Left</i>                            | -0.03                                 | 0.499   | 0.743        | -0.09               | 0.686   | 0.891        | 0.40                                     | <0.001  | <b>0.001*</b>     | 0.38                | <0.001  | <b>0.001*</b>     | 0.01                                     | 0.945   | 0.974        | 0.06                | 0.729   | 0.913        |
| <i>Middle longitudinal fascicle Right</i>       | 0.00                                  | 0.421   | 0.693        | 0.20                | 0.101   | 0.283        | 0.41                                     | <0.001  | <b>&lt;0.001*</b> | 0.51                | <0.001  | <b>&lt;0.001*</b> | 0.13                                     | 0.495   | 0.851        | 0.04                | 0.849   | 0.920        |
| <i>Middle longitudinal fascicle Left</i>        | -0.06                                 | 0.581   | 0.828        | 0.25                | 0.063   | 0.204        | 0.32                                     | <0.001  | <b>&lt;0.001*</b> | 0.25                | <0.001  | <b>&lt;0.001*</b> | 0.27                                     | 0.150   | 0.748        | 0.23                | 0.215   | 0.748        |
| <i>Inferior occipito-frontal fascicle Right</i> | 0.10                                  | 0.221   | 0.436        | 0.51                | 0.003   | 0.066        | 0.42                                     | <0.001  | <b>0.001*</b>     | 0.54                | <0.001  | <b>0.001*</b>     | -0.06                                    | 0.742   | 0.916        | 0.31                | 0.094   | 0.748        |
| <i>Inferior occipito-frontal fascicle Left</i>  | 0.04                                  | 0.329   | 0.568        | 0.46                | 0.006   | 0.077        | 0.34                                     | 0.001   | <b>&lt;0.001*</b> | 0.47                | 0.001   | <b>&lt;0.001*</b> | 0.17                                     | 0.351   | 0.755        | 0.31                | 0.085   | 0.748        |
| <i>Optic Radiation Right</i>                    | 0.00                                  | 0.429   | 0.694        | 0.48                | 0.005   | 0.075        | 0.31                                     | <0.001  | <b>&lt;0.001*</b> | 0.51                | <0.001  | <b>&lt;0.001*</b> | 0.07                                     | 0.707   | 0.898        | 0.22                | 0.230   | 0.748        |
| <i>Optic Radiation Left</i>                     | -0.06                                 | 0.589   | 0.836        | 0.33                | 0.028   | 0.124        | 0.19                                     | <0.001  | <b>&lt;0.001*</b> | 0.28                | <0.001  | <b>&lt;0.001*</b> | 0.01                                     | 0.960   | 0.974        | 0.28                | 0.122   | 0.748        |

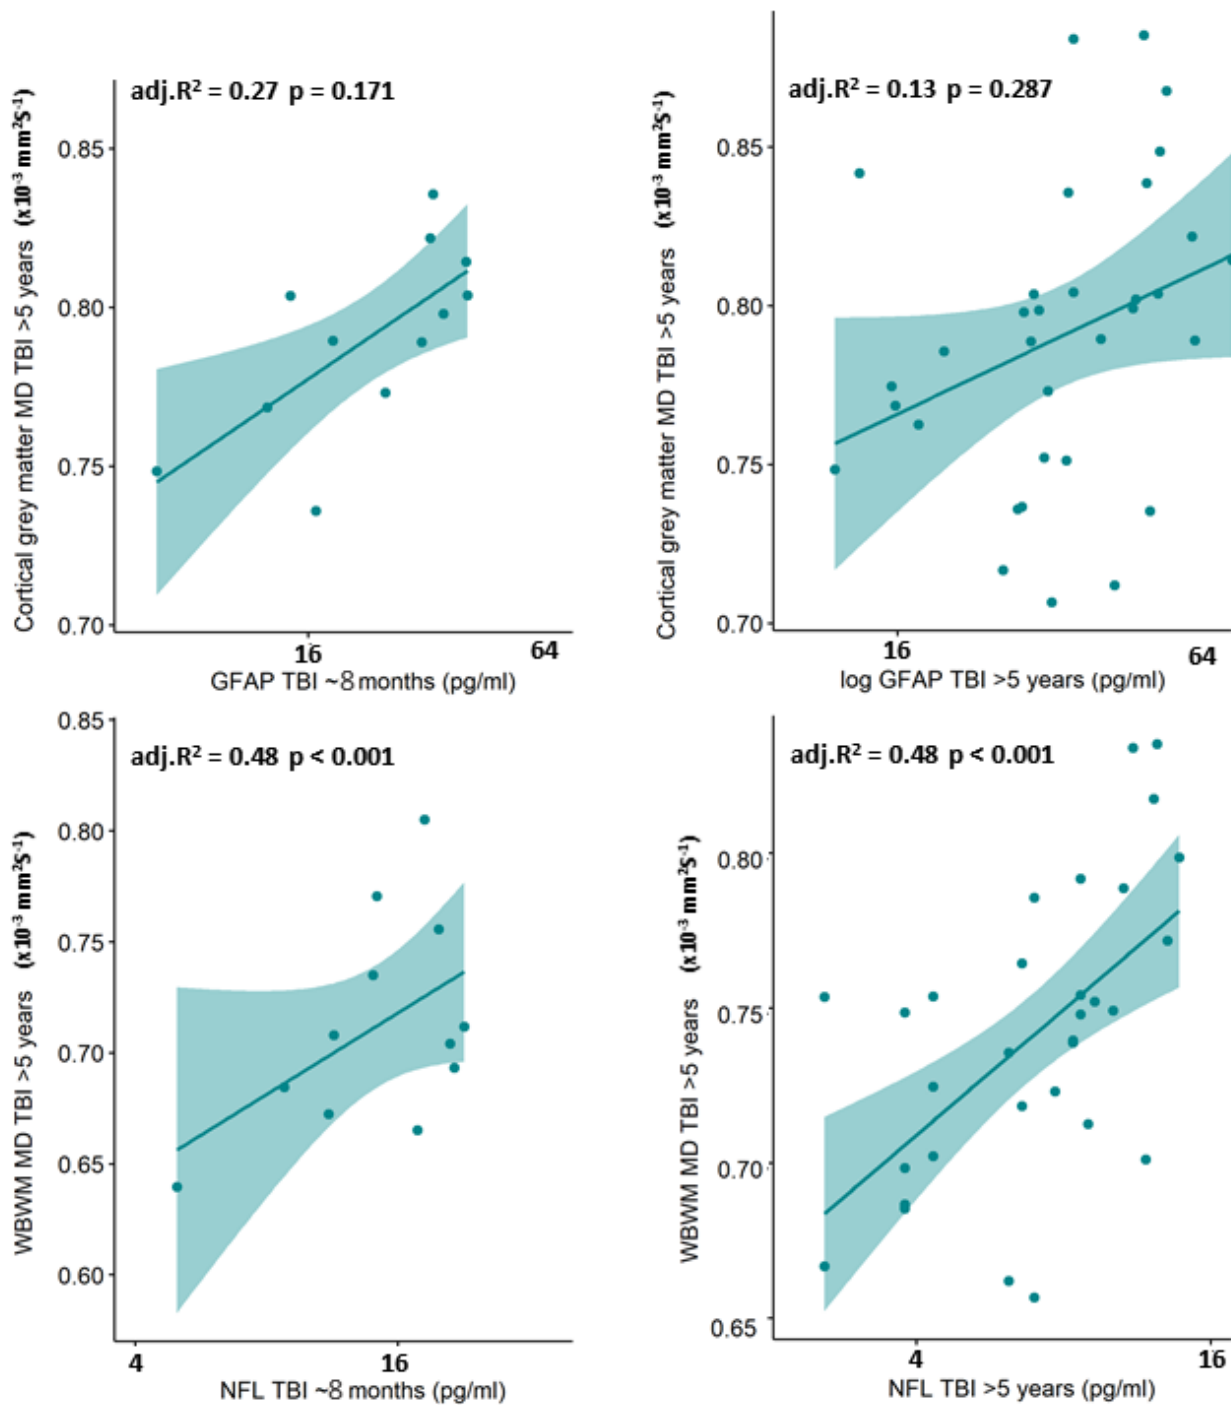

**Supplementary Figure S3. GFAP at ~8 months is associated with WBGM MD levels >5 years after injury (Panel A). NFL levels >5 years after injury significantly correlate with MD in WBWM (Panel D). The correlations of panels A and C become non-significant when corrected for age and sex (A: adjusted  $R^2$  0.27  $p = 0.171$ , C: adjusted  $R^2$  -0.02  $p = 0.471$ ).**

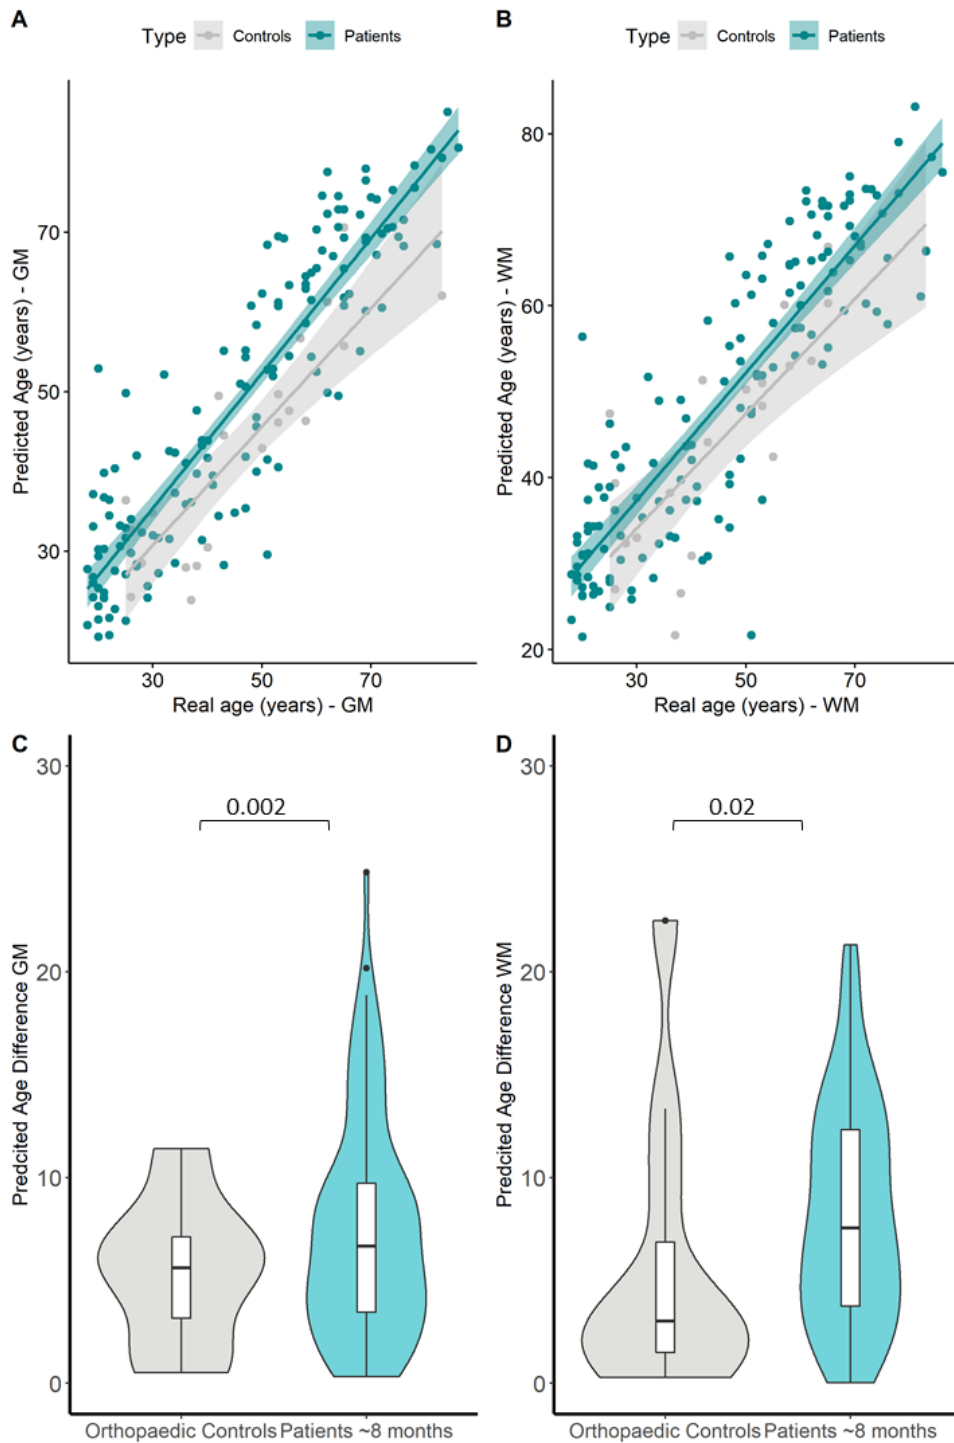

**Supplementary Figure S4. Predicted brain age and predicted brain age difference for patients imaged ~8 months after injury compared to orthopaedic trauma controls.**

Predicted brain age versus actual for grey matter (WBGM) (Panel A: Orthopaedic trauma controls  $R = 0.86$   $P < 0.0001$ , Patients  $R = 0.79$ ,  $P < 0.0001$ ) and white matter (WBWM) (Panel B: Orthopaedic trauma controls  $R = 0.90$ ,  $P < 0.0001$ , Patients  $R = 0.88$ ,  $P < 0.0001$ ). Comparison of predicted brain age difference and mean Jacobian Determinants for WBGM and WBWM between orthopaedic trauma controls and patients ~8 months after injury (Mann-Whitney U, Uncorrected p-values; WBGM  $p = 0.002$ , WBWM  $p = 0.02$ ) (Panels C and D).

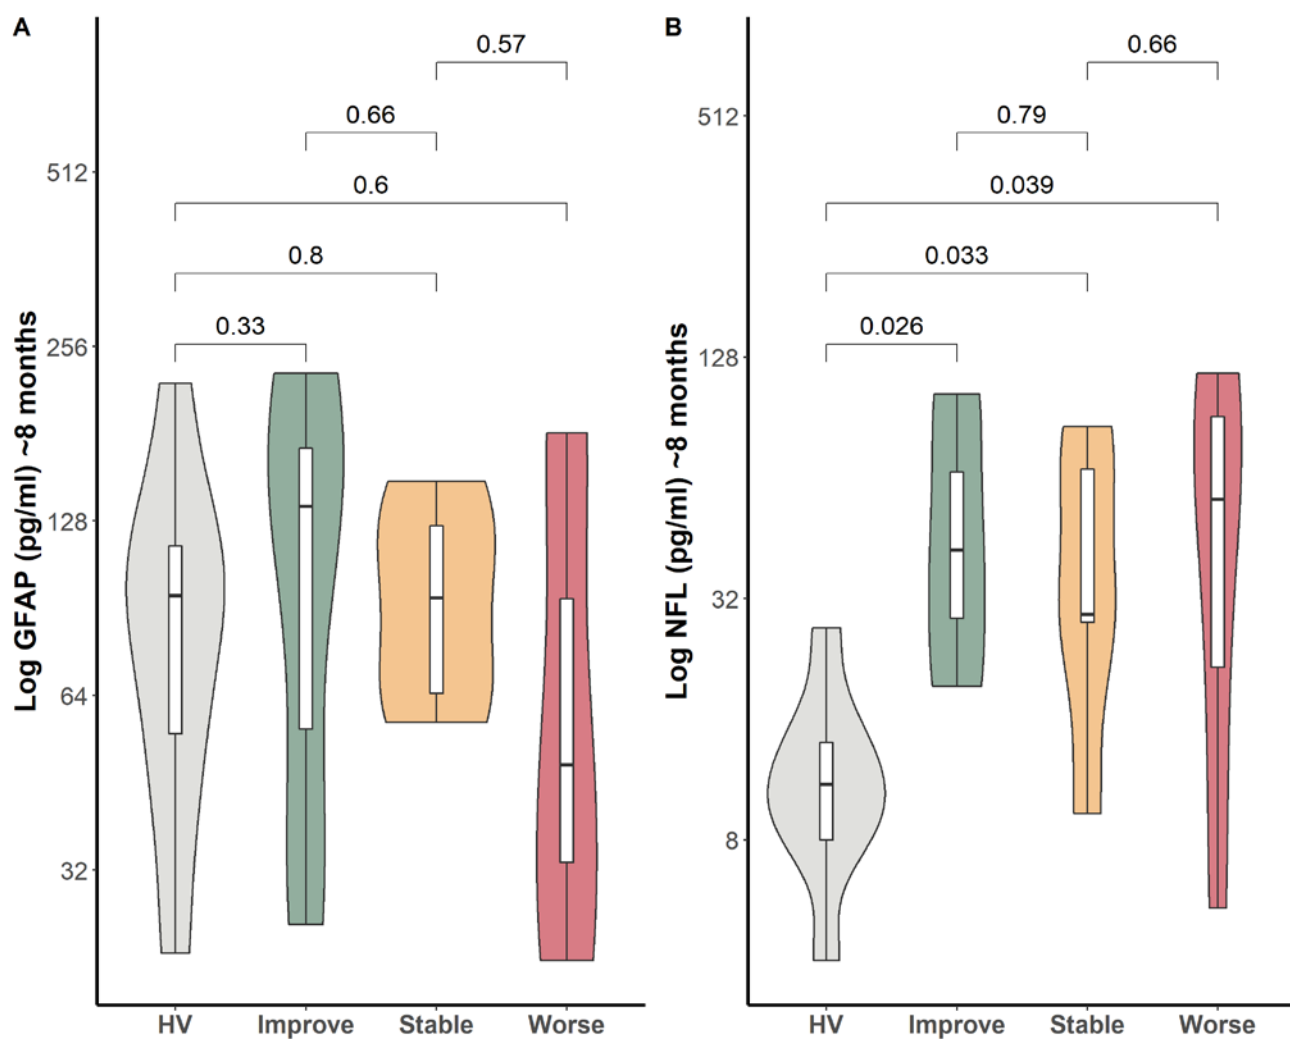

**Supplementary Figure S5. Levels of GFAP and NFL taken at ~8 months after injury (panels A and B) in subgroups of patients who showed improving (Improve; increase in GOSE  $\geq$  1 point), Stable (no change in GOSE), or worsening (Worse; reduction in GOSE  $\geq$  1 point) between ~8 months and >5 years post-injury.**

HV = healthy volunteers. Figures above box plots show unadjusted p values for comparisons (Mann-Whitney 'U').

### Key findings

- \*1: NFL at ~8 m correlates with imaging at ~8 months
- \*1: GFAP at ~8 months correlates with imaging at ~8 months
- \*2: NFL at > 5 years correlates with imaging at >5 years
- \*2: Variable secondary elevation of GFAP at >5 years
- \*3: NFL at ~8 months predicts change in imaging (~8m → >5y)
- \*3: GFAP at ~8 months predicts GFAP at >5 years
- \*4: NFL at 5 years differs depending on GOSE trajectory

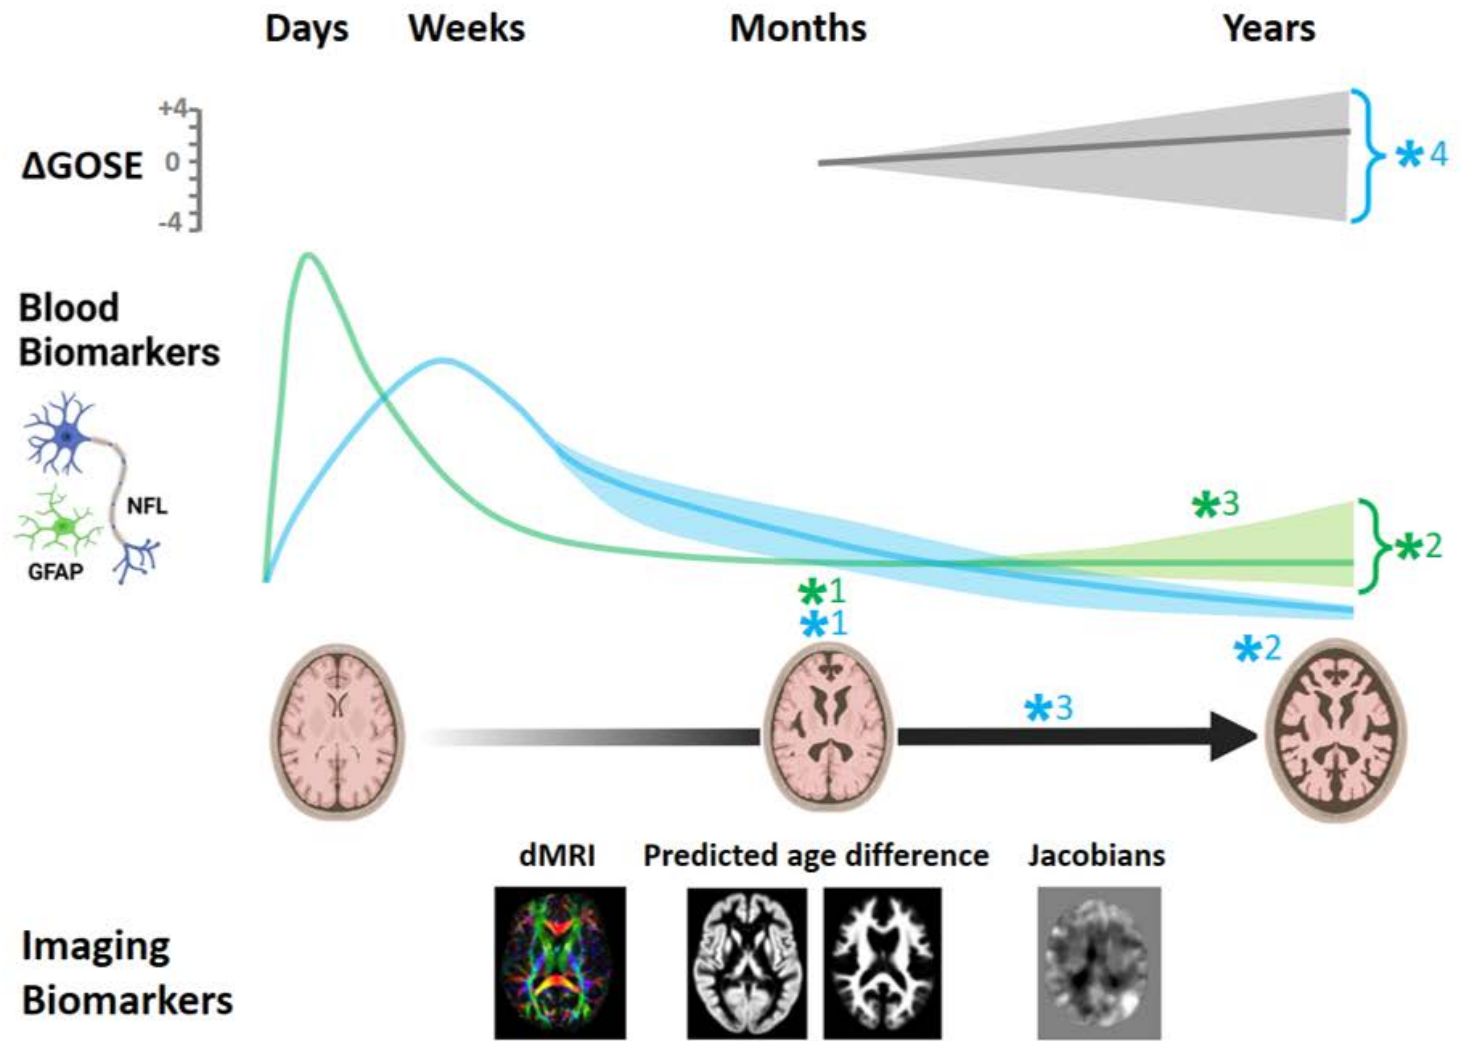

Supplementary Figure S6. Schematic diagram summarising the key results.
